# Supplementary material for: Heat-triggered Dynamic Self-healing Framework for Variable-temperature Stable Perovskite Solar Cells
Source: Research Square preprint supplement (doi:10.21203/rs.3.rs-4527071/v1), 2024-06-18
Supplement: Supplementary file 1 [file 554df1997e17e4b5003607b9.docx]

**Heat-triggered Dynamic Self-healing Framework for Variable-temperature Stable Perovskite Solar Cells**

**Table of contents**

**Supplementary Note 1-4**

**Supplementary Figure 1-23**

**Supplementary Table 1**

**Supplementary Note 1.** Space Charge Limited Current (SCLC) analysis

The trap density was calculated according to the equation: VTFL=qntrapL2/2ε0ε

where VTEL is the trap-filled limiting voltage, q is the elementary charge, L is the perovskite film thickness, ε0 is the vacuum constant and ε is the dielectric constant of perovskite.

**Supplementary Note 2.** Thermal Admittance Spectroscopy (TAS) analysis

The trap density of trap states: Nt=

Where *V*bi, q, W, C, *,* K, and T correspond to the following physical quantities: the built-in potential, elementary charge, depletion width, capacitance, angular frequency, Boltzmann constant, and temperature, respectively.

**Supplementary Note 3.** The dependence of *V*OC and *J*SC of PSCs on light intensity analysis

1. Diode ideal factor n was obtained via the formula: n=

Where K is the Boltzmann constant, T is the absolute temperature and q is the elementary charge. refers to the fitting slope of *V*OC versus the logarithm of light intensity.

1. Bimolecular recombination can be reflected by a log-log plot of *J*SC versus incident light intensity (I), the relationship is according to the equation: *J*SC∝Iα.

**Supplementary Note 4.** The maximum photoinduced carrier generation rate (*G*max) and charge collection probability (*P*c) analysis

photocurrent density*J*ph is calculated by

*J*ph=*J*L-*J*D (1)

where *J*L and *J*D are referring to the current density under illumination (100 mW/cm2) and in the dark, respectively

internal voltage (*V*int) is calculated by

*V*int=*V*bi-*V*app (2)

where *V*bi is the built-in potential, and *V*app is the applied voltage.

*J*ph increases continuously at low voltage, and then tends to saturation, where the saturation photocurrent (*J*ph,sat) is only limited by the number of absorbed photons.

Therefore, (*J*ph,sat) can be described by

*J*ph,sat=qL*G*max (3)

where q is the elementary charge, L is the thickness of perovskite film, and *G*max is the maximum photoinduced carrier generation rate per unit volume.

*J*ph is also determined by

*J*ph=qL*G*max*P*c (4)

Where Pc is the charge collection probability,

Combined with the above formulas,

*P*c =*J*ph/*J*ph,sat (5)


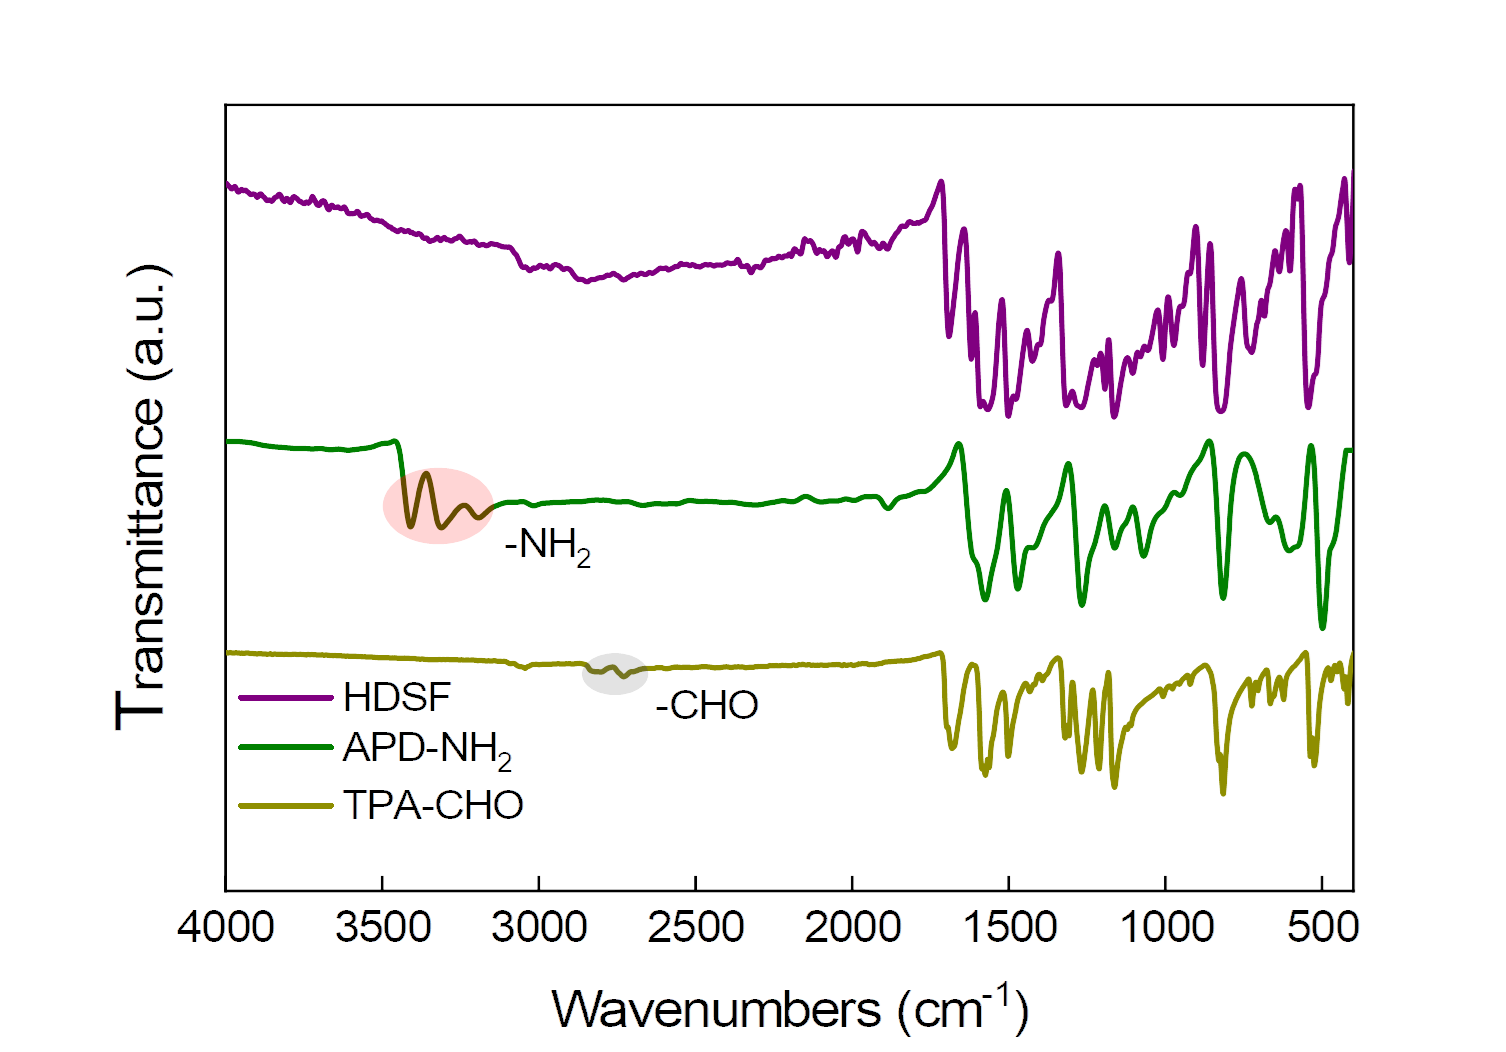


**Supplementary Fig.1.** Transmittance FT-IR spectra of APD, TPA, and HDSF.


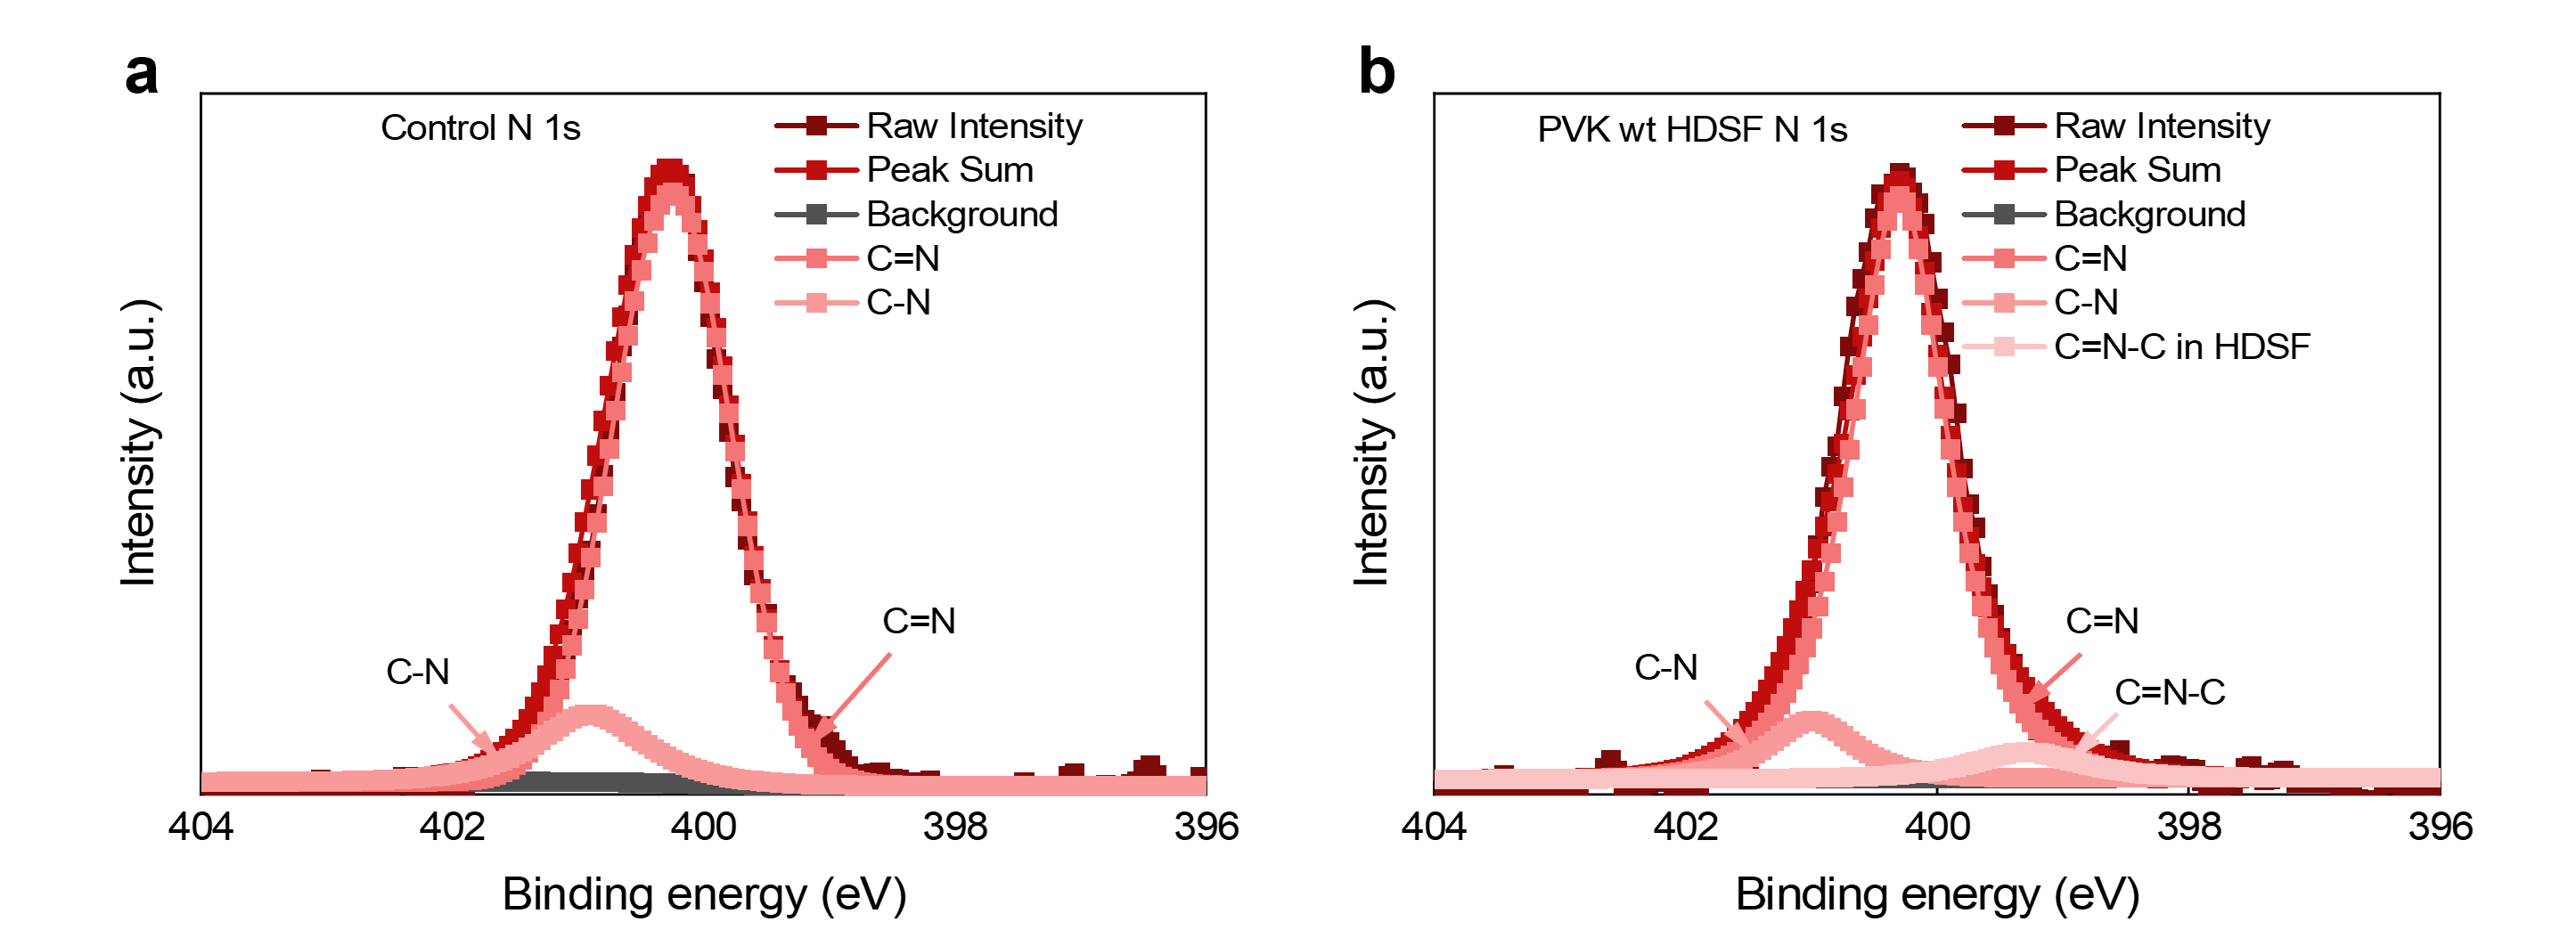


**Supplementary Fig. 2.** N1s XPS spectra of PVK films without a) and with b) HDSF.


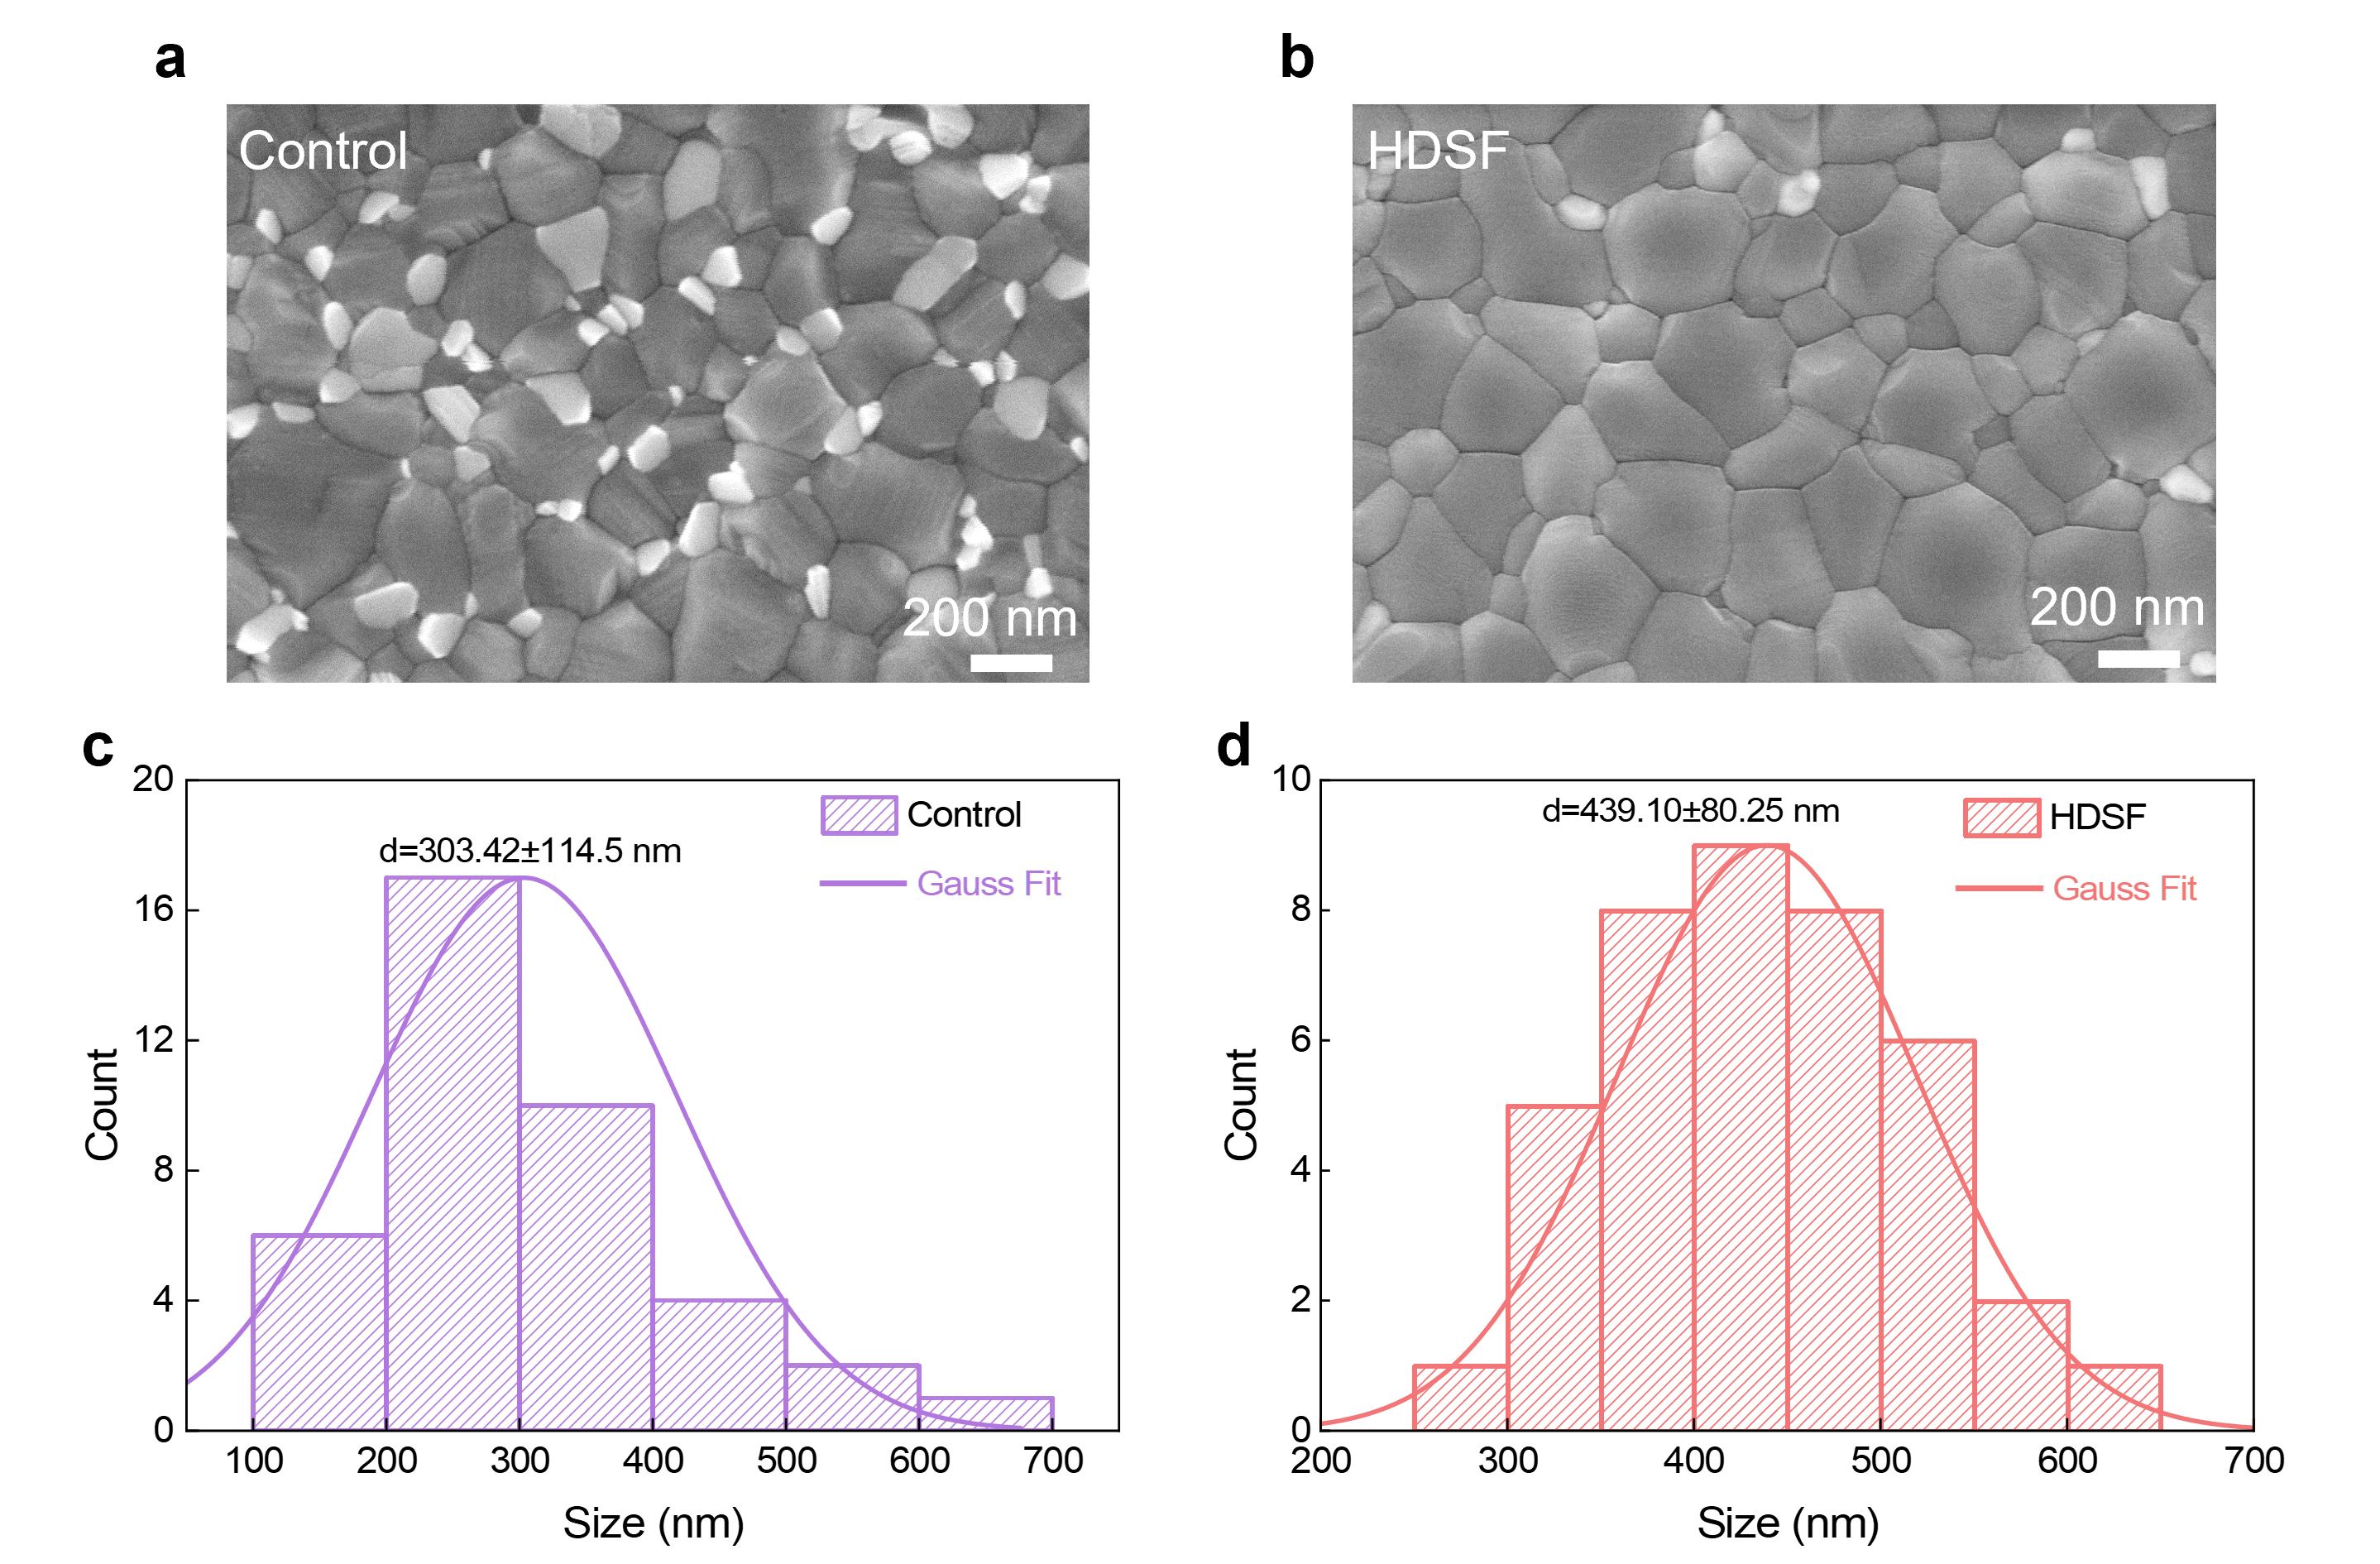


**Supplementary Fig. 3.** Top-view SEM images of a) control PVK, and b) PVK: HDSF films.Statistic grain size distribution histograms of c) control and d) HDSF-treated perovskite films.


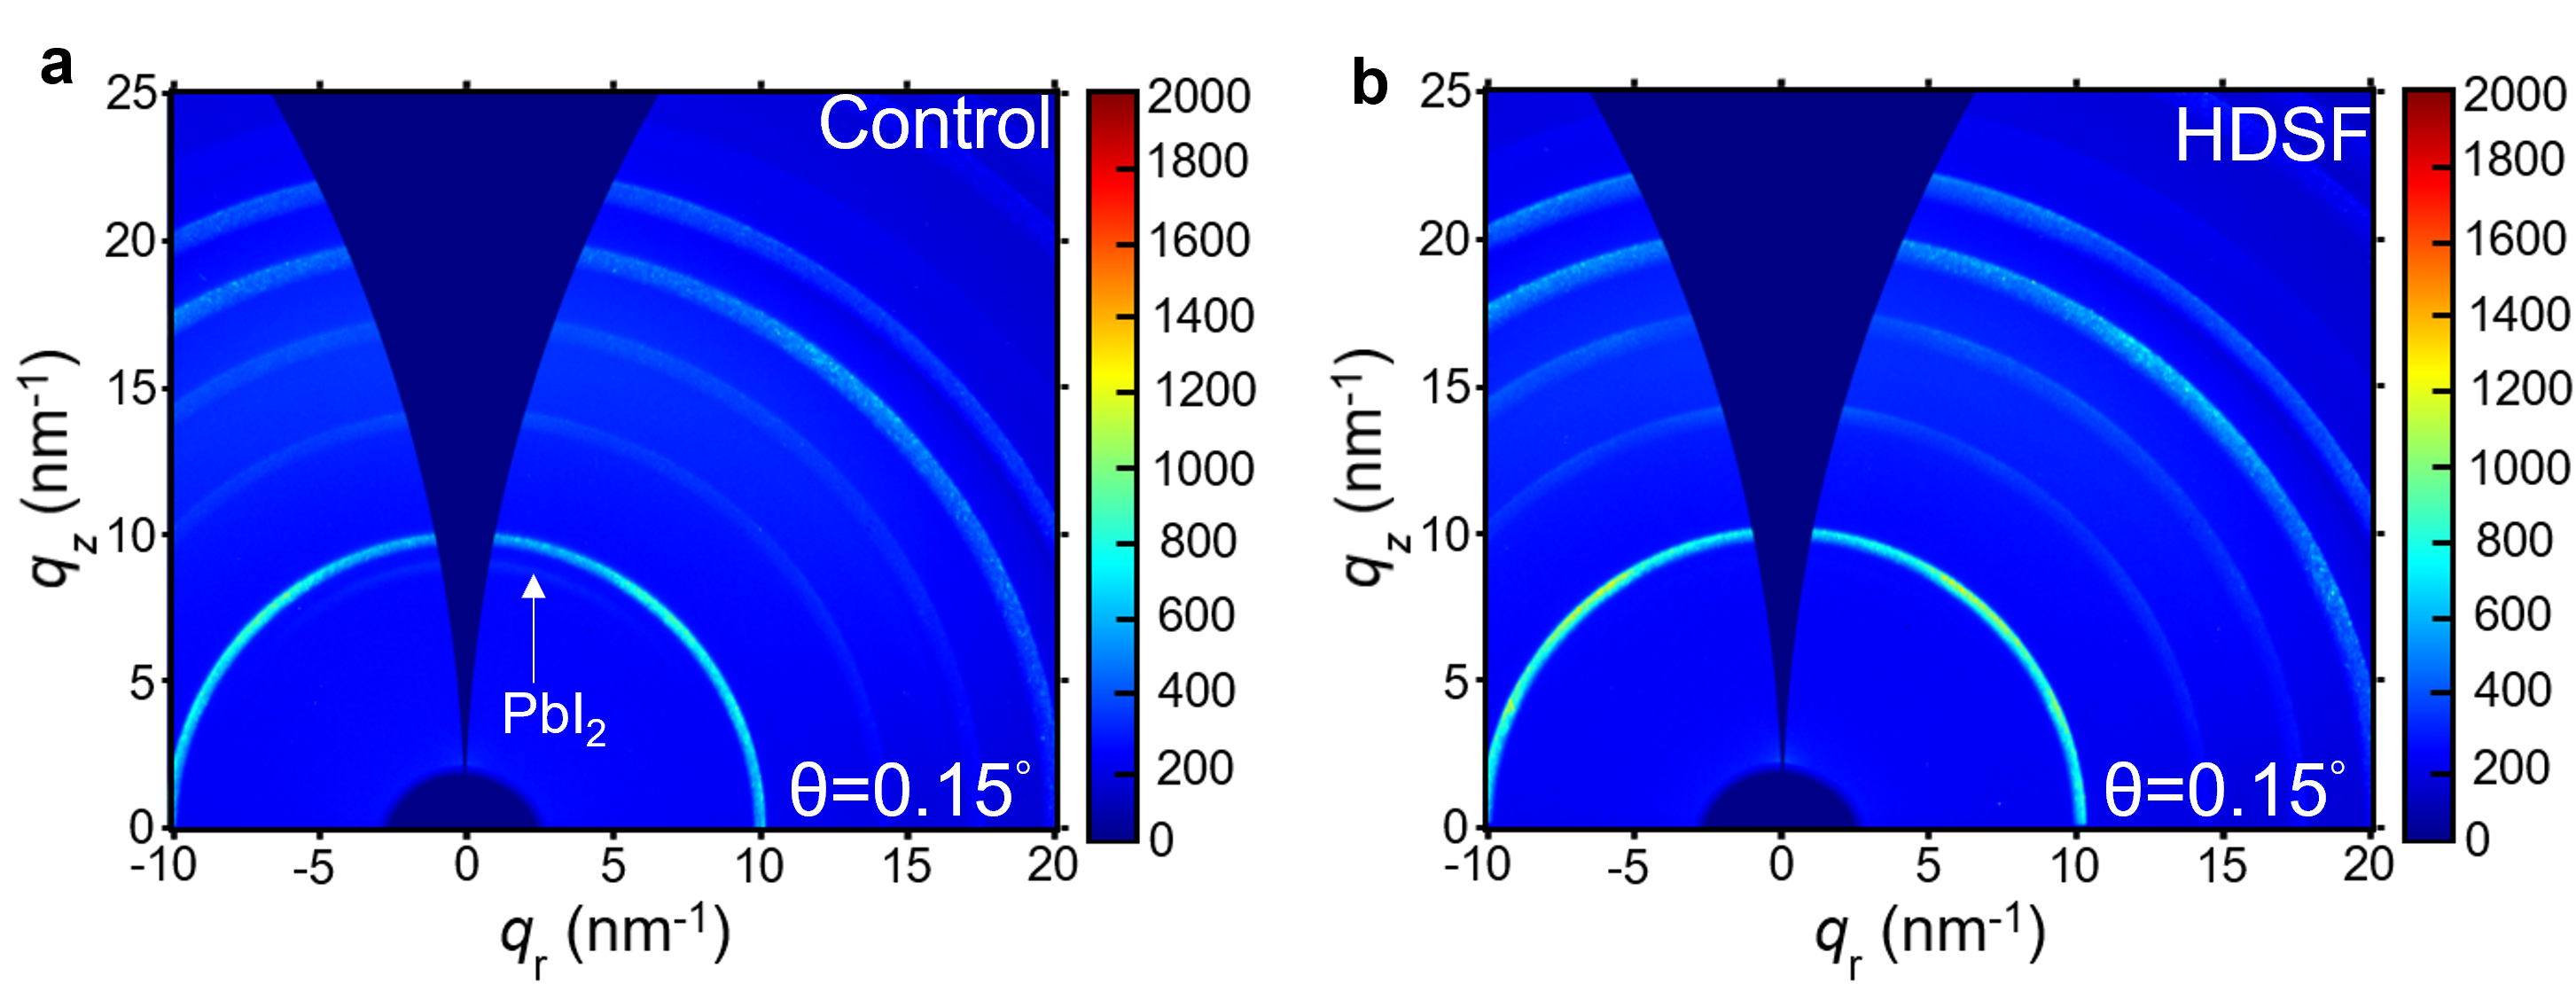


**Supplementary Fig. 4.** GIWAXS patterns of perovskite films surface: a) Control PVK, and b) PVK: HDSF films at incident angles of 0.15°.


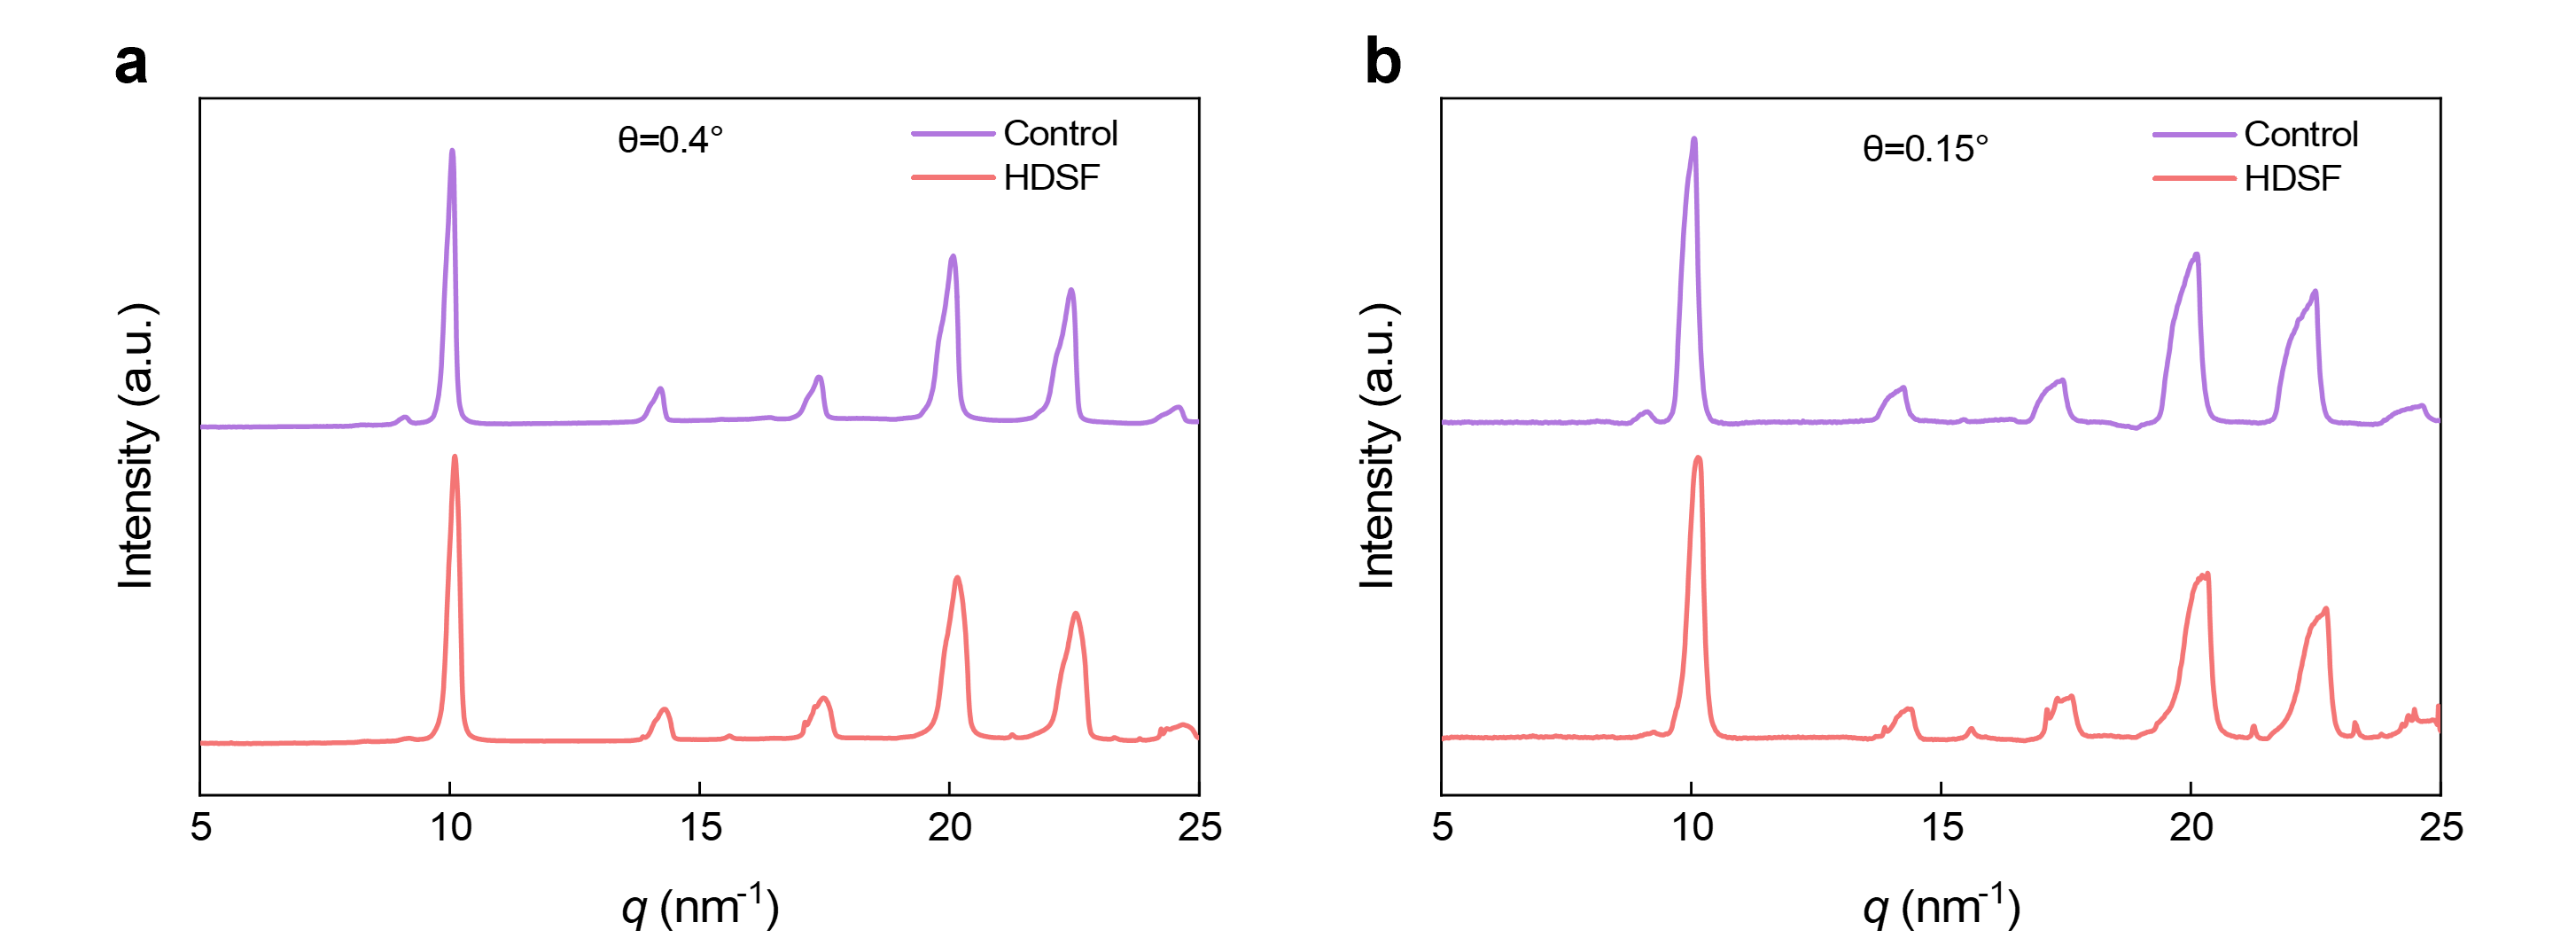


**Supplementary Fig. 5.** Azimuthally integrated 1D (out-of-plane direction, azimuth=90°) of PVK films at incident angles of a) 0.4° and b) 0.15°.


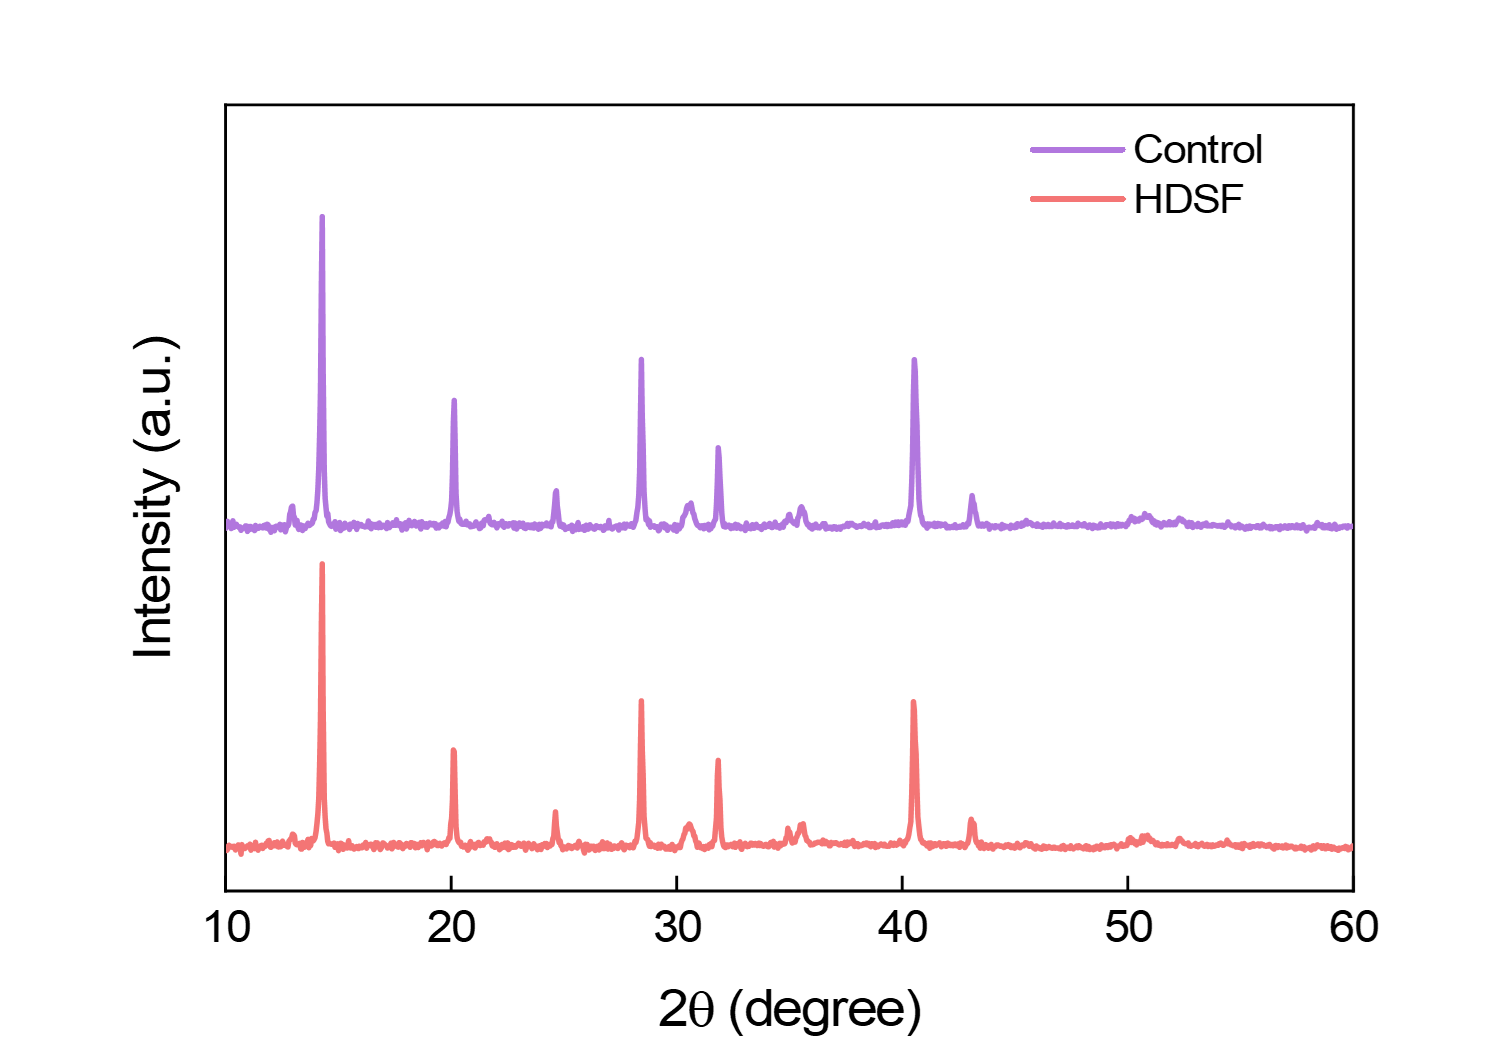


**Supplementary Fig. 6.** XRD patterns of PVK films with and without HDSF.


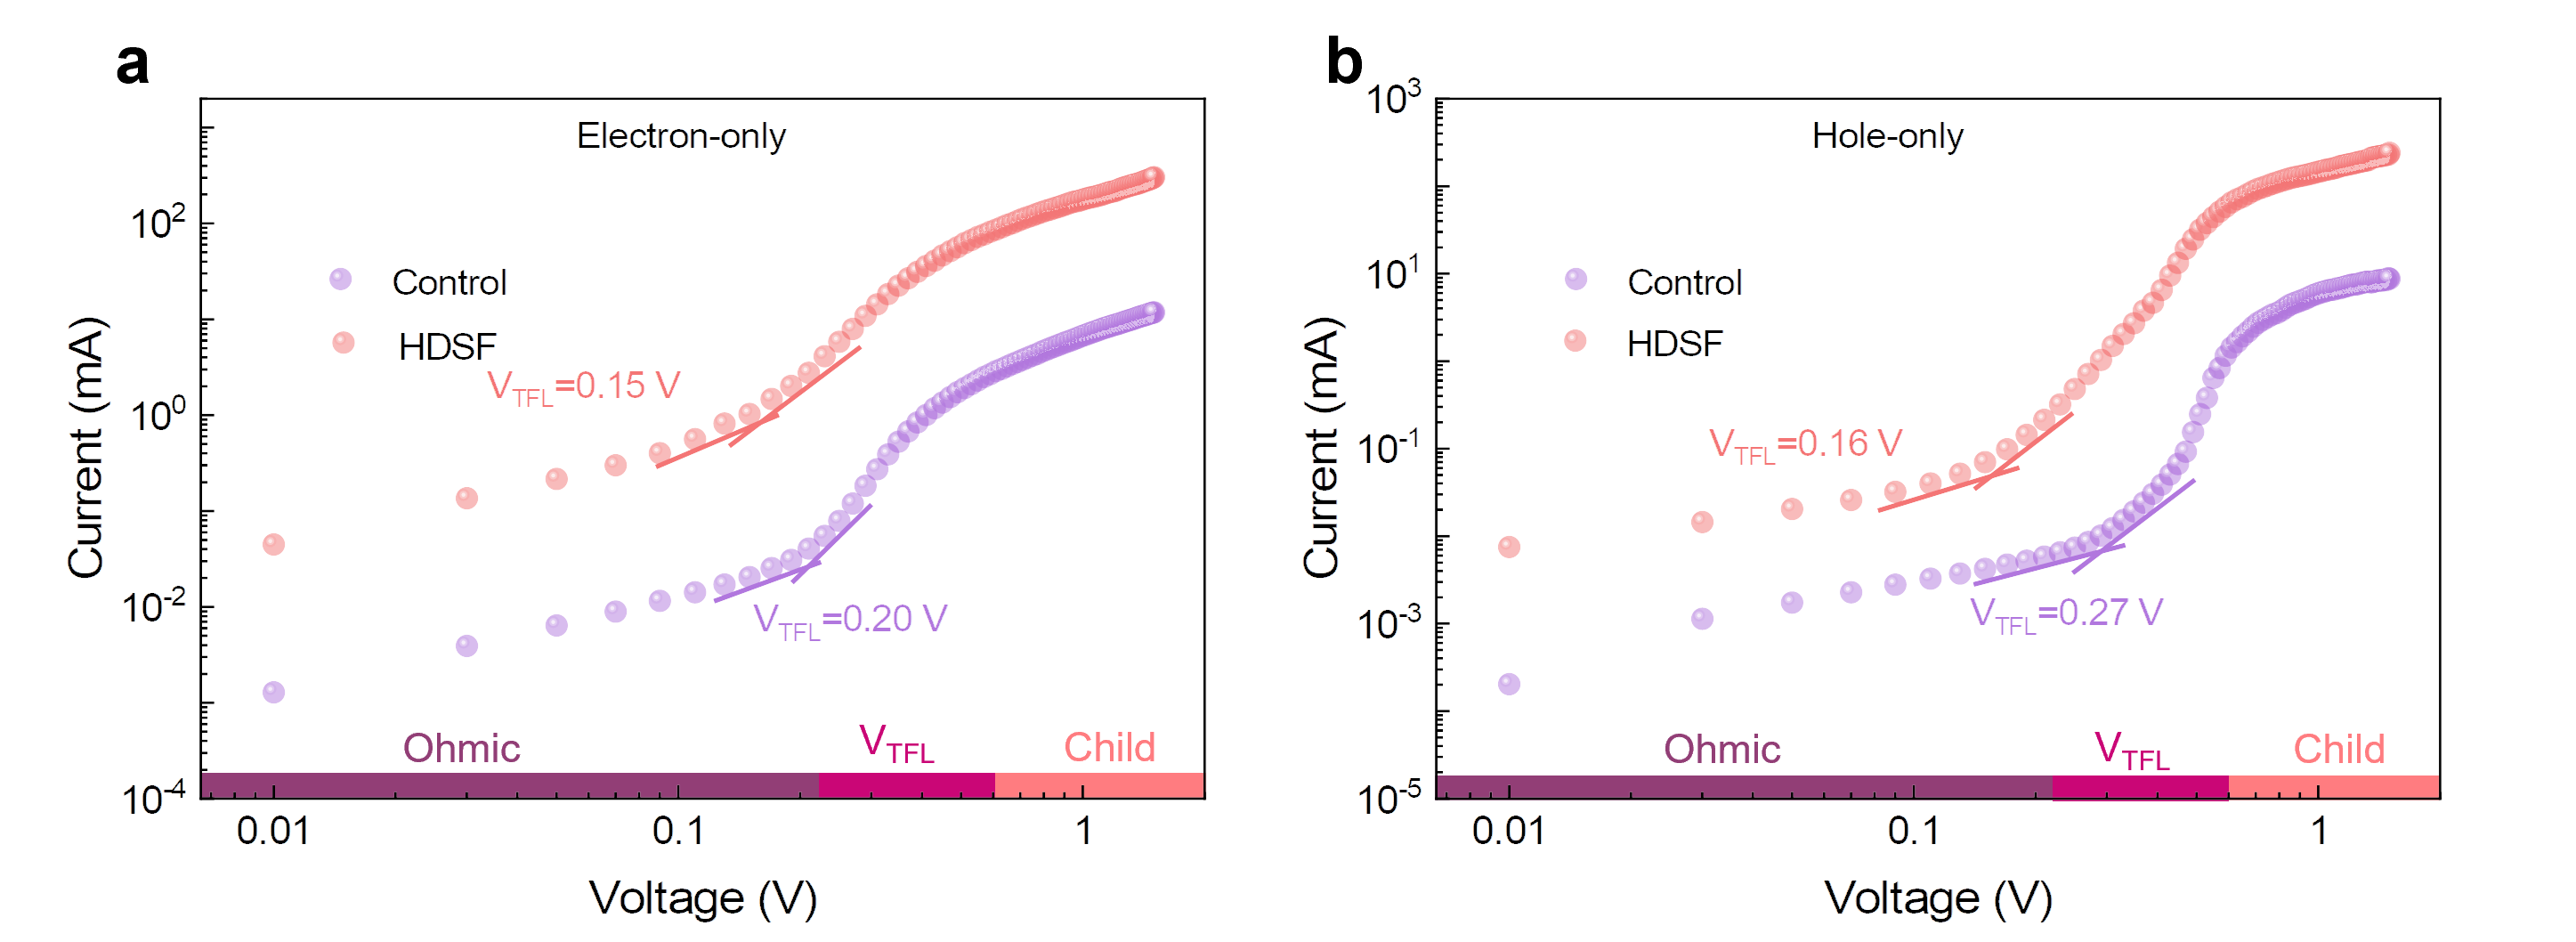


**Supplementary Fig. 7.** SCLC curves for the a) electron-only and b) hole-only devices.


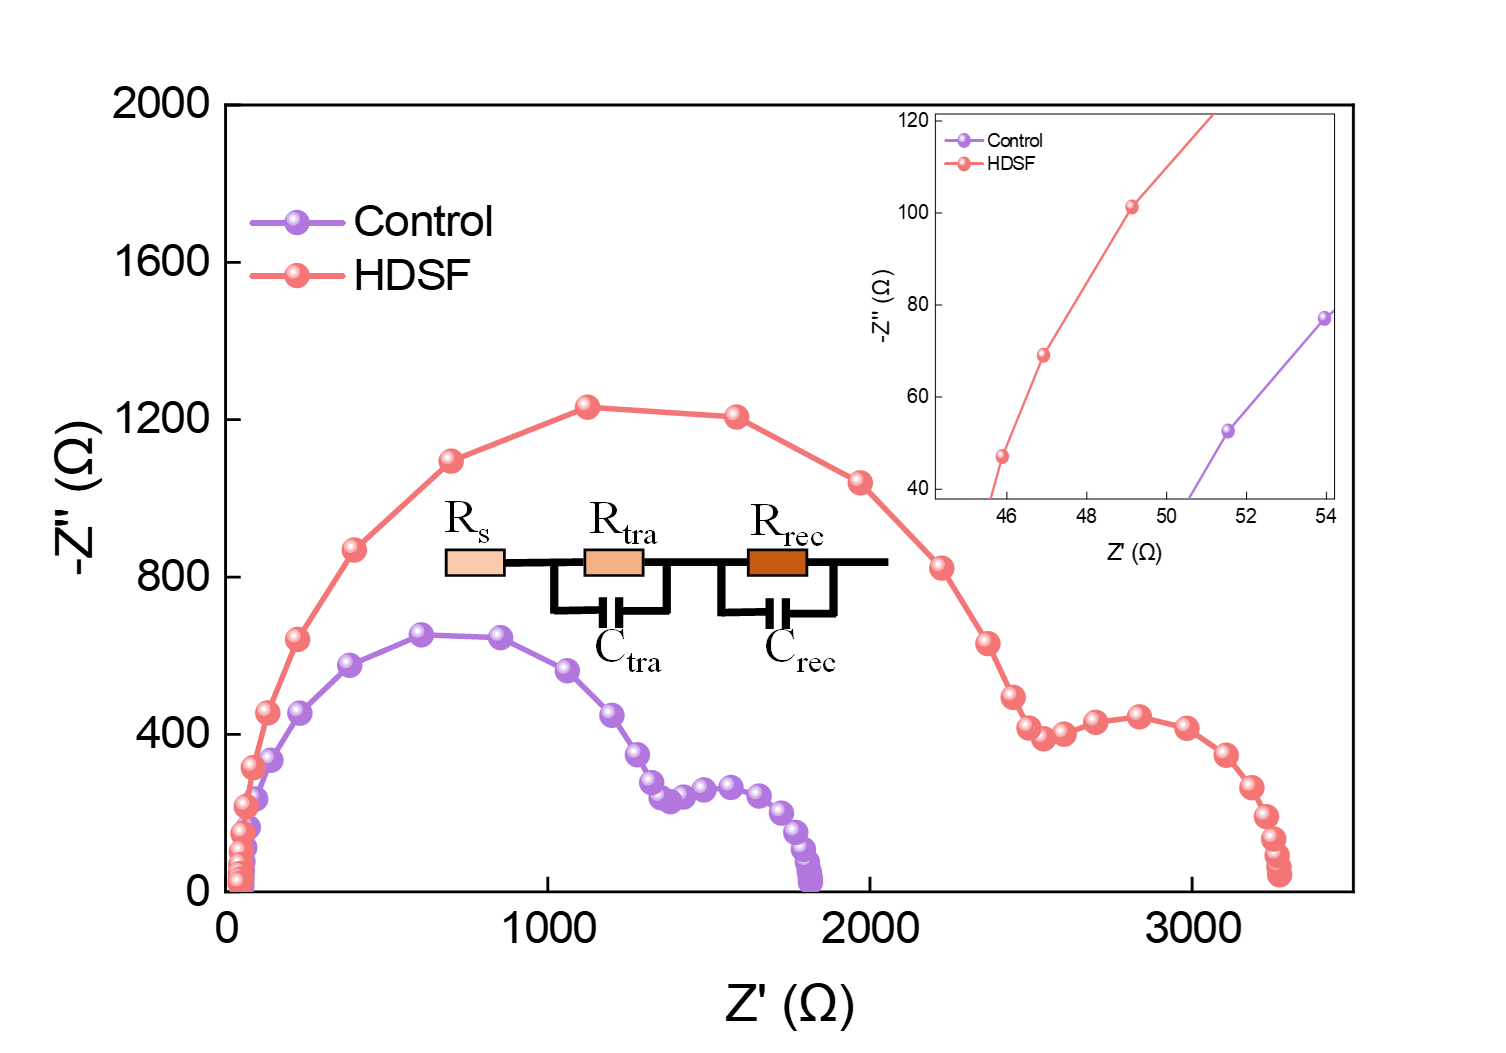


**Supplementary Fig. 8.** Electrical impedance spectra for devices, and the internal illustration includes the corresponding equivalent circuit diagram along with an enlarged view of Rtra.


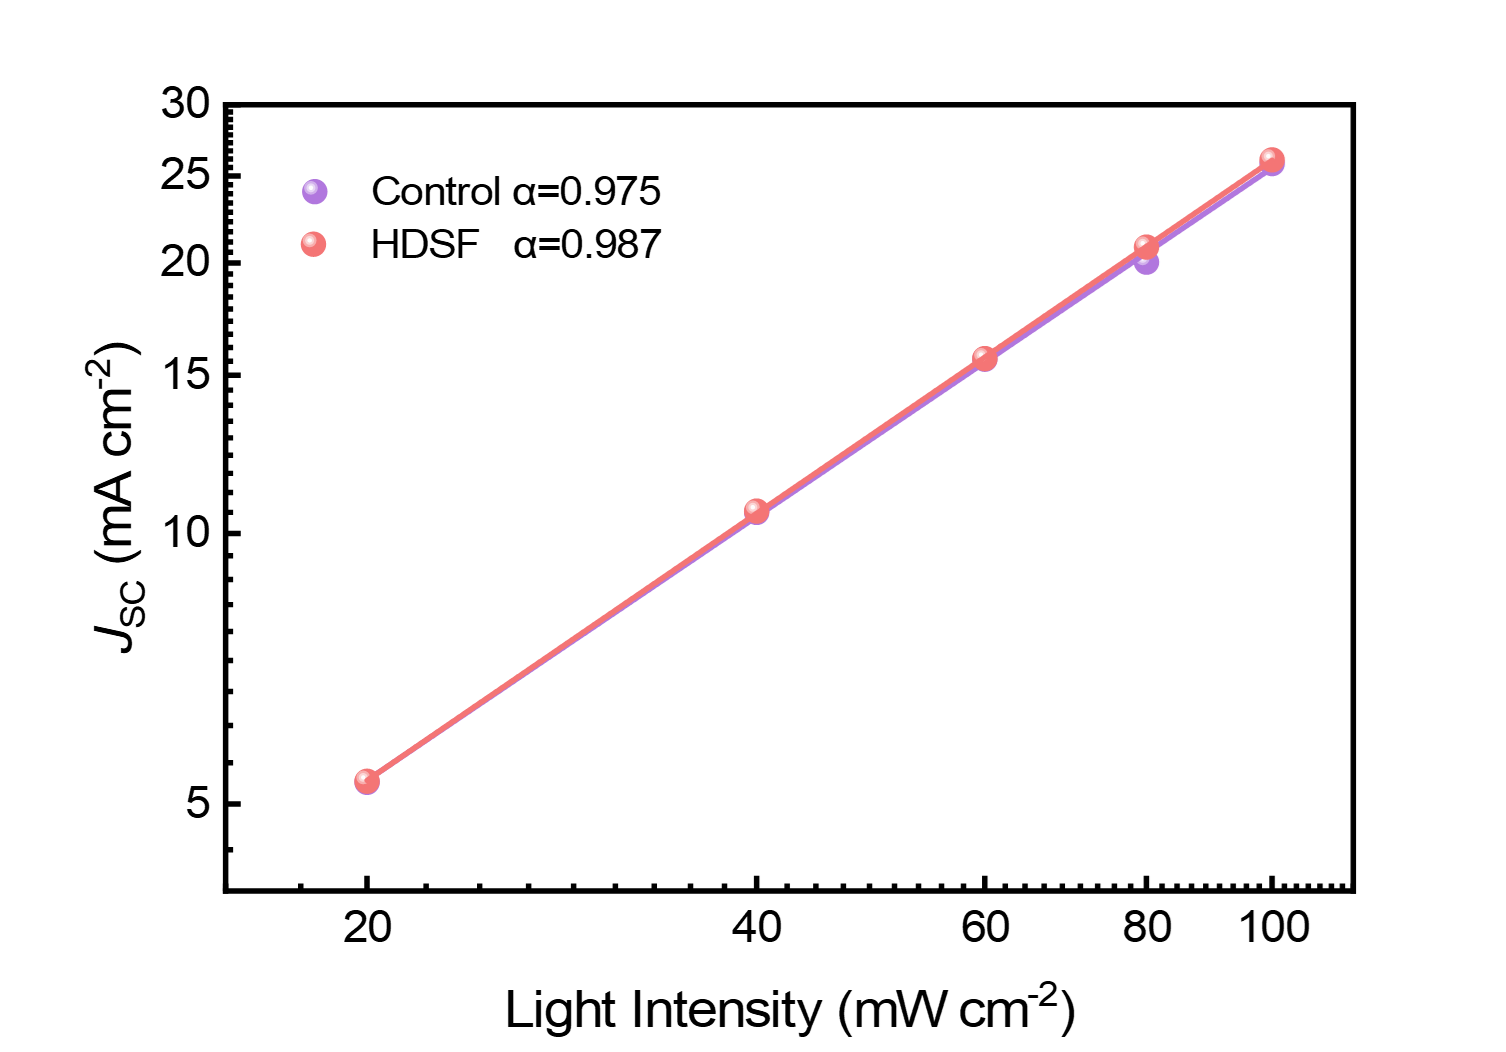


**Supplementary Fig. 9.** *J*SC versus light intensity plots for devices.


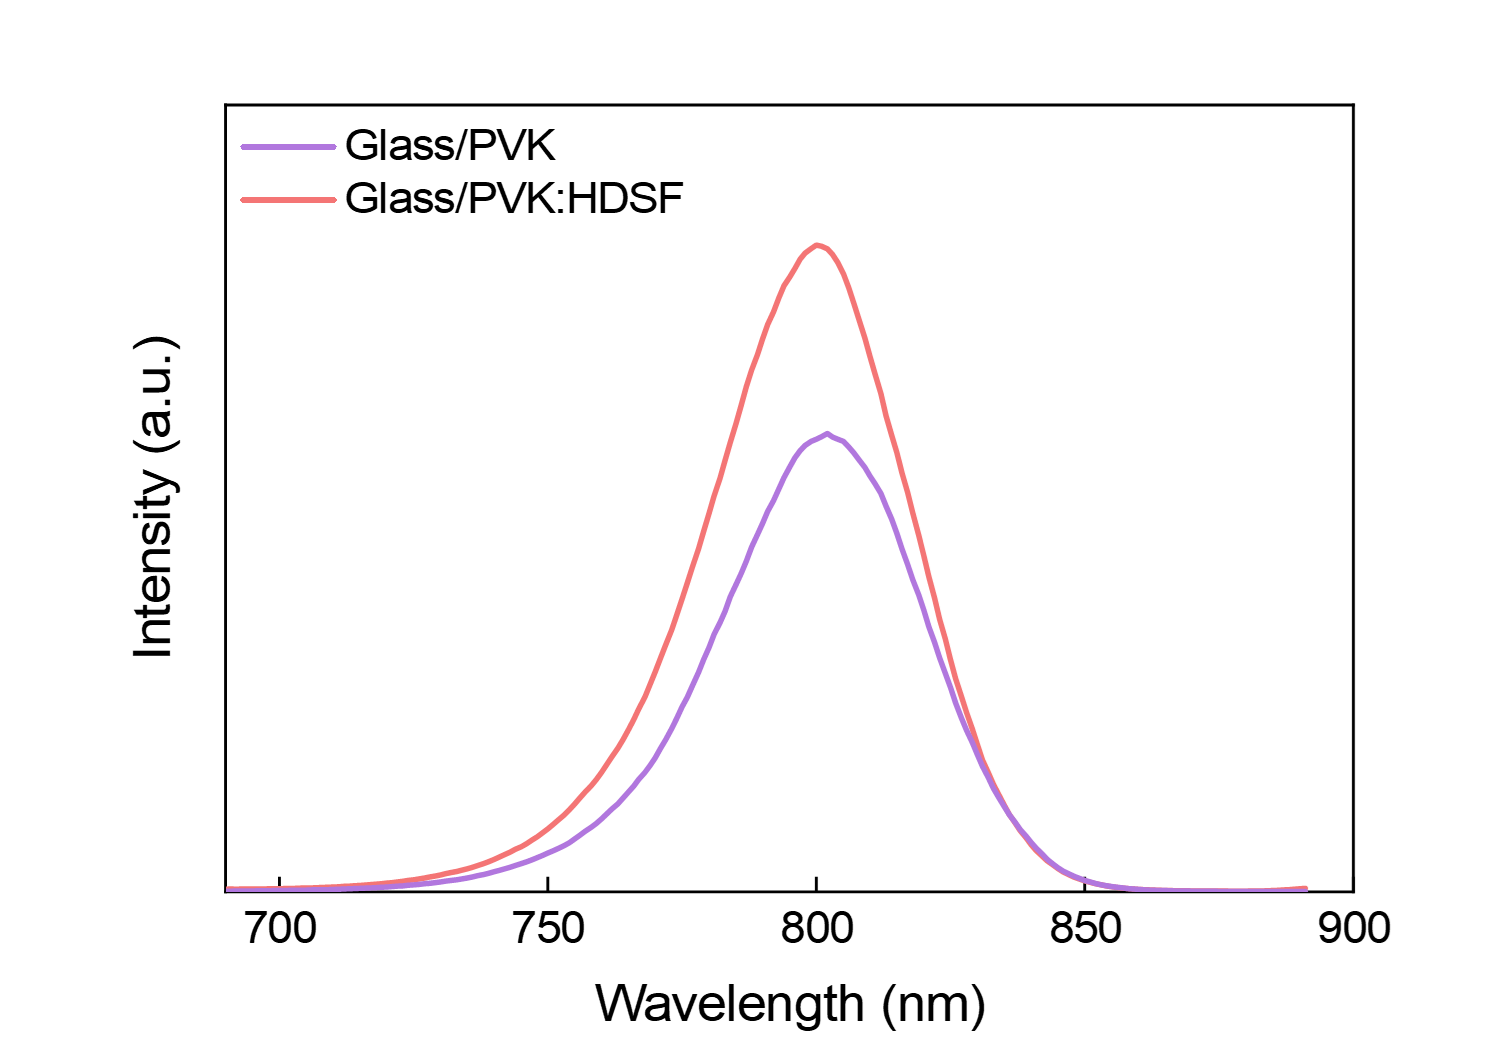


**Supplementary Fig. 10.** PL spectra of PVK films with or without HDSF.


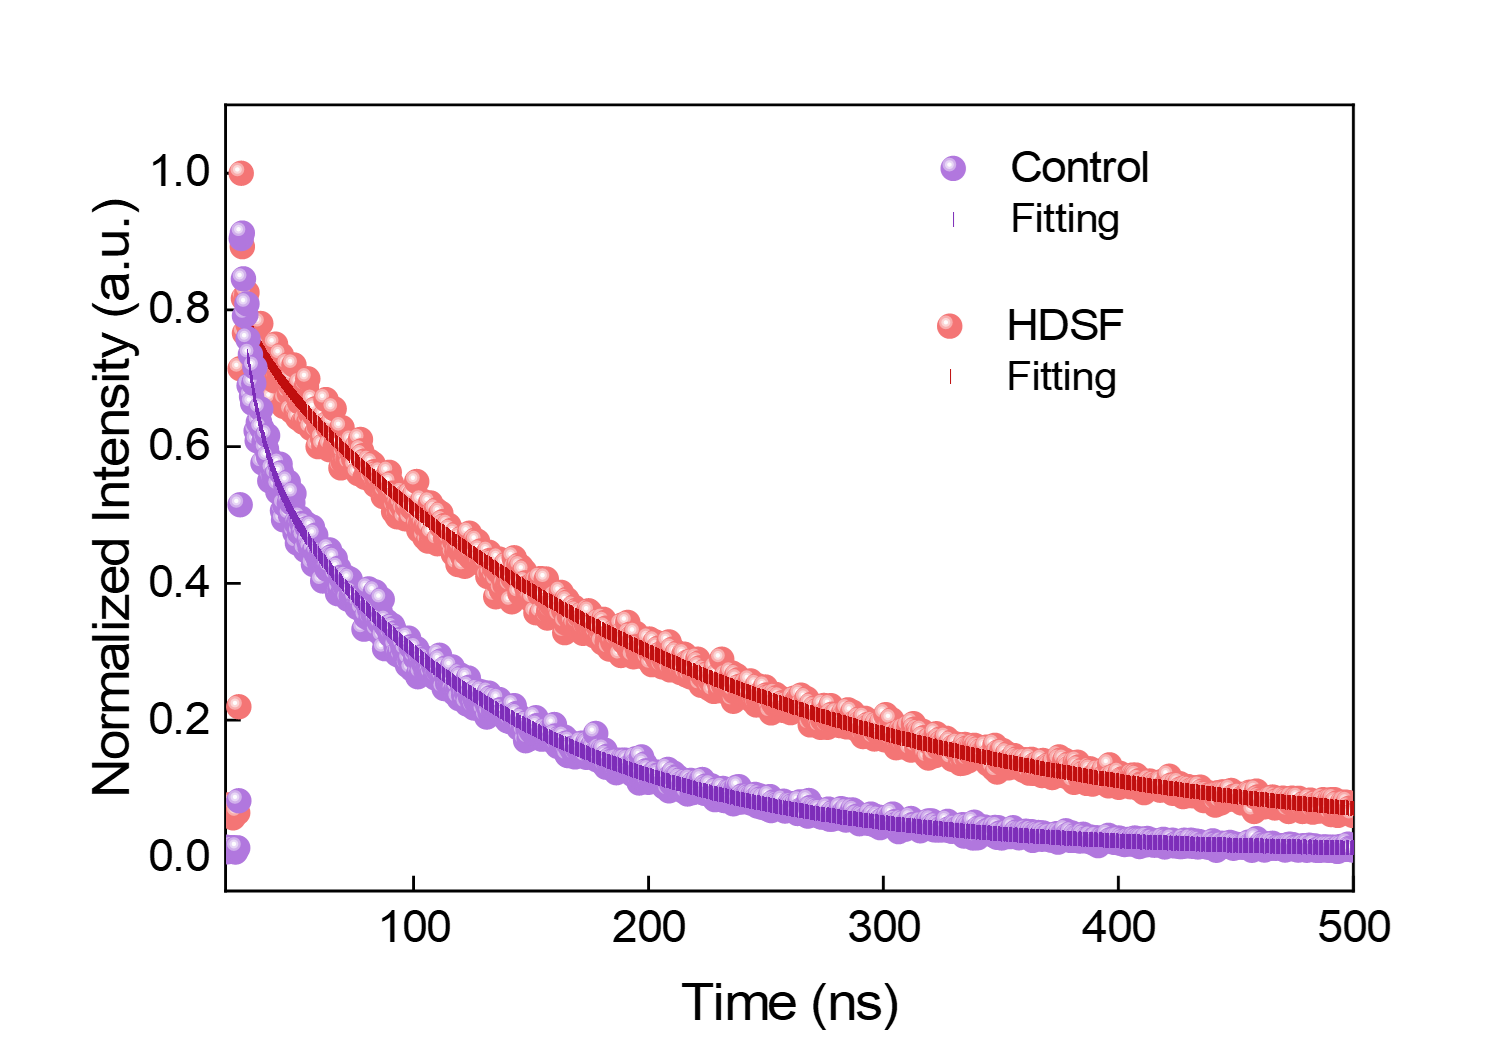


**Supplementary Fig. 11.** TRPL spectra of PVK with or without HDSF coated on glass.


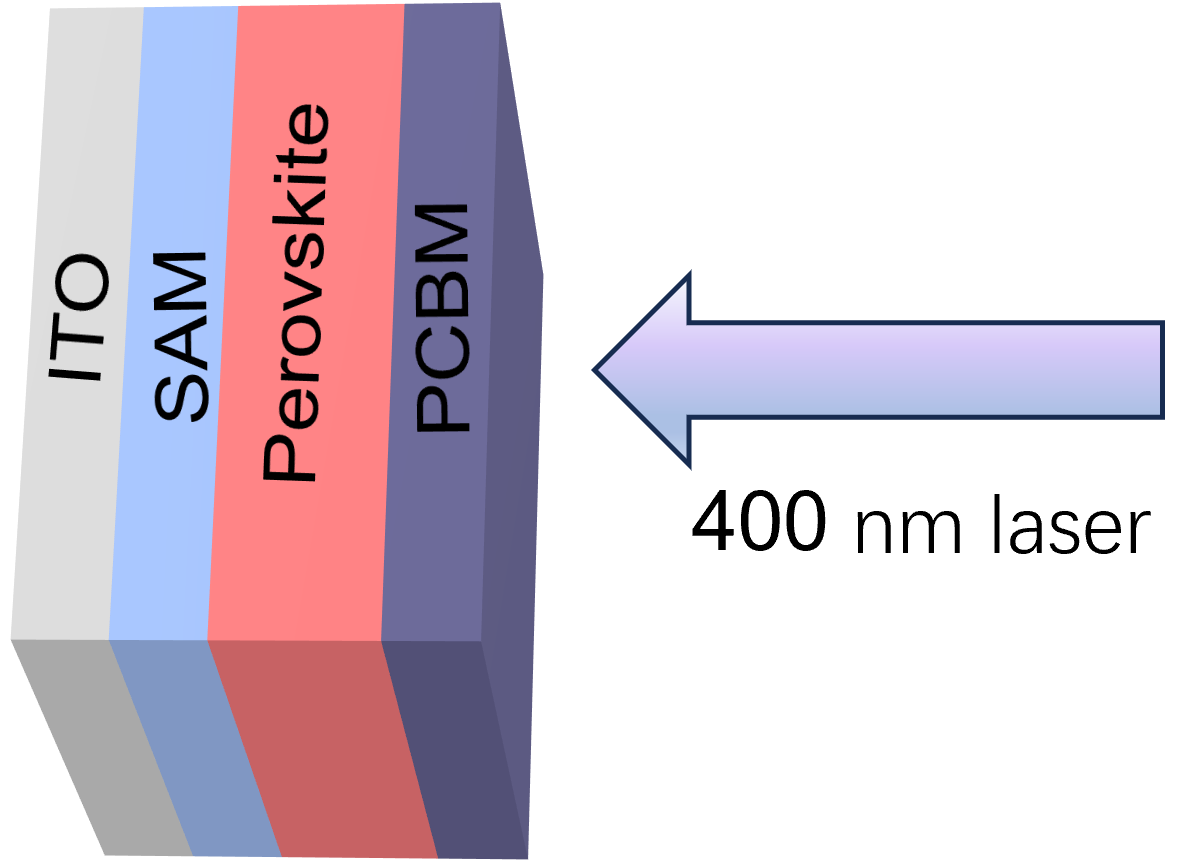


**Supplementary Fig. 12.** The schematic of the sample structure (FTO/SAM/PVK with or without HDSF) for the TA measurement, a 400 nm pump laser was used to probe the TA signal.


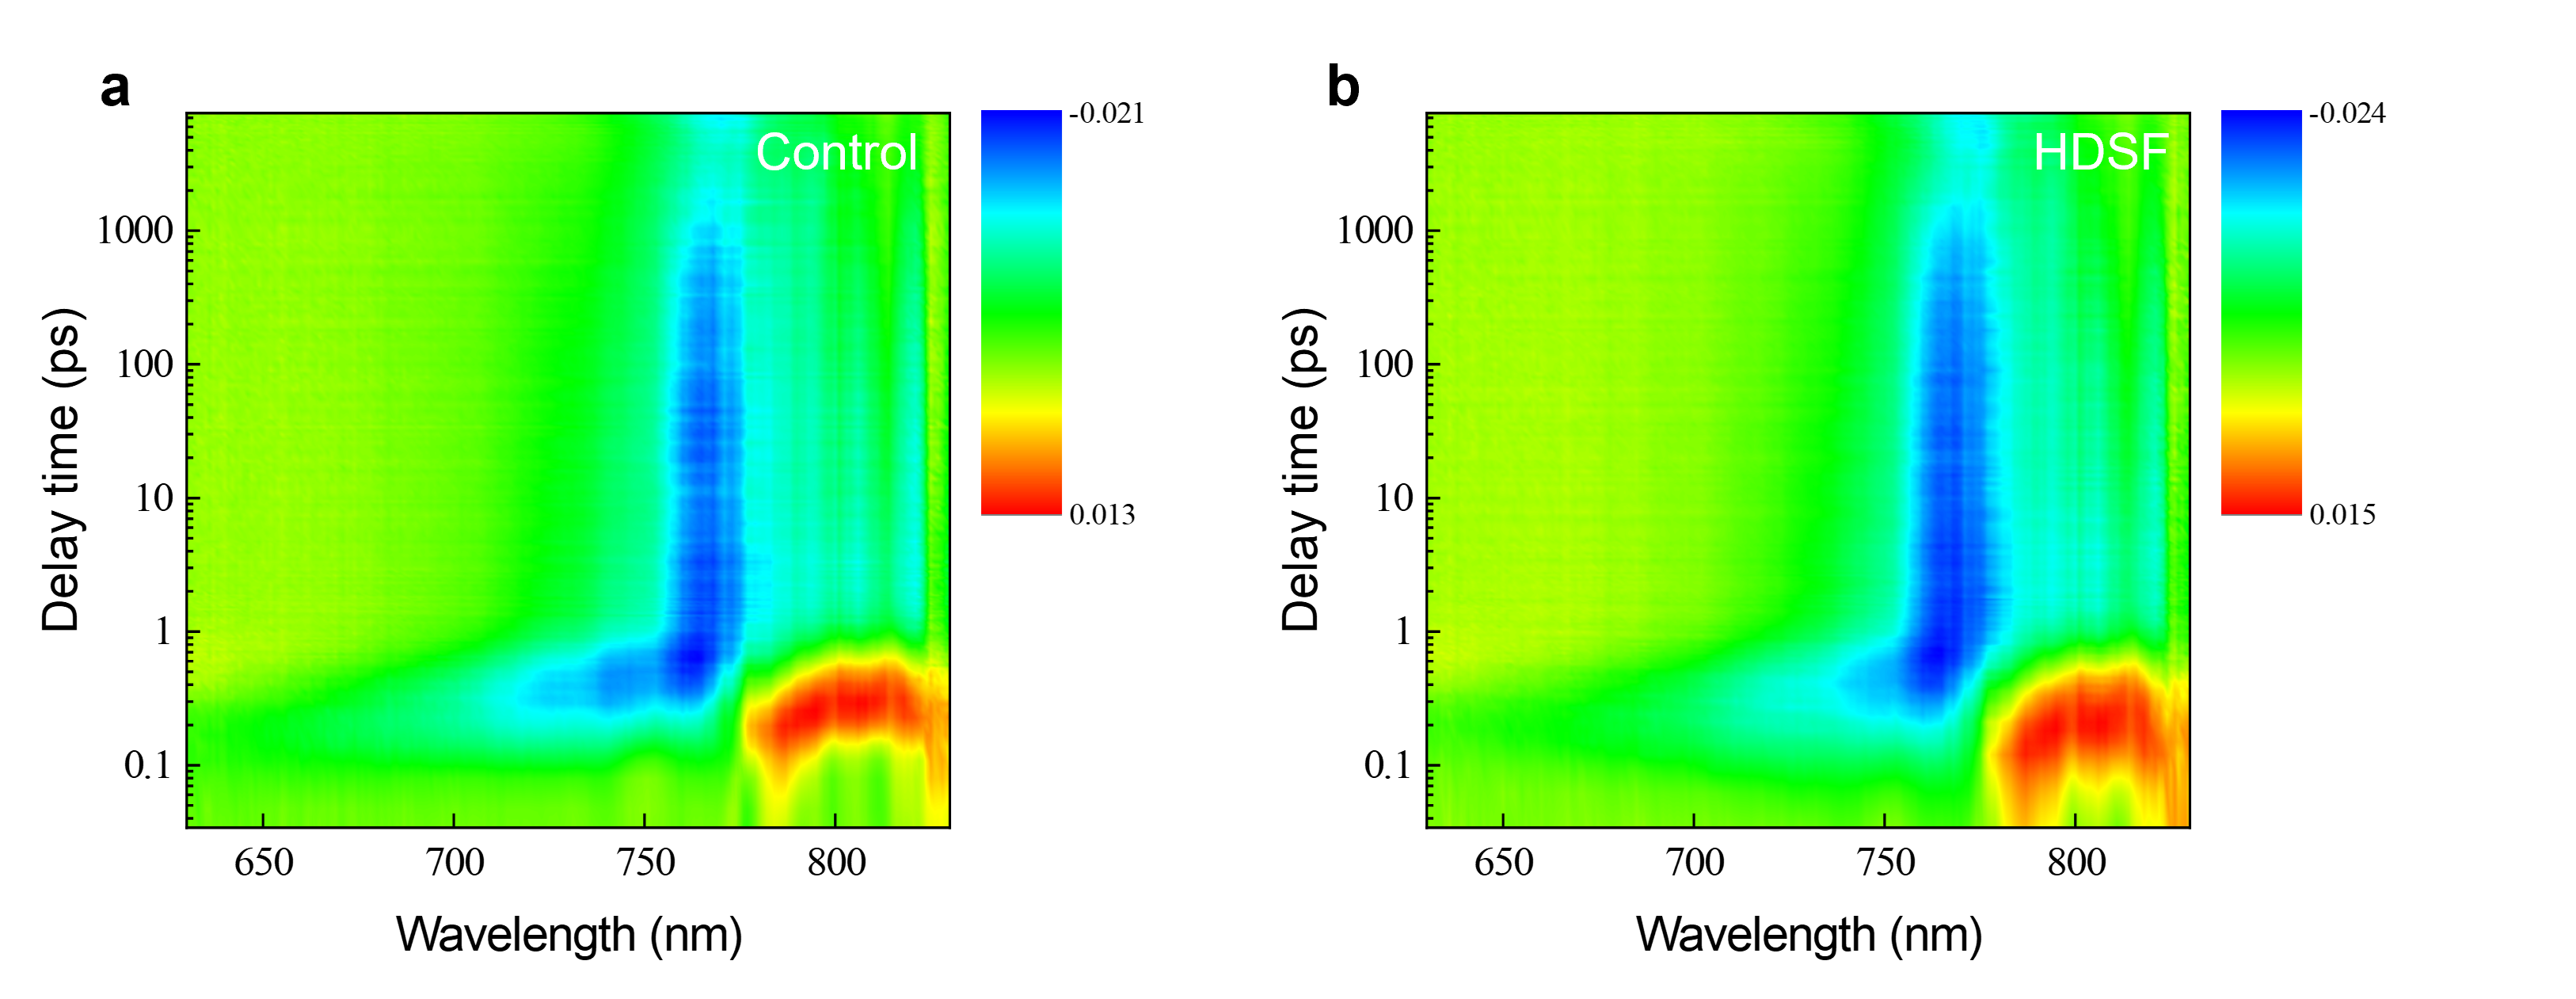


**Supplementary Fig. 13.** The pseudocolor TA spectrum of a) FTO/SAM/PVK/PCBM, b) FTO/SAM/PVK: HDSF/PCBM.


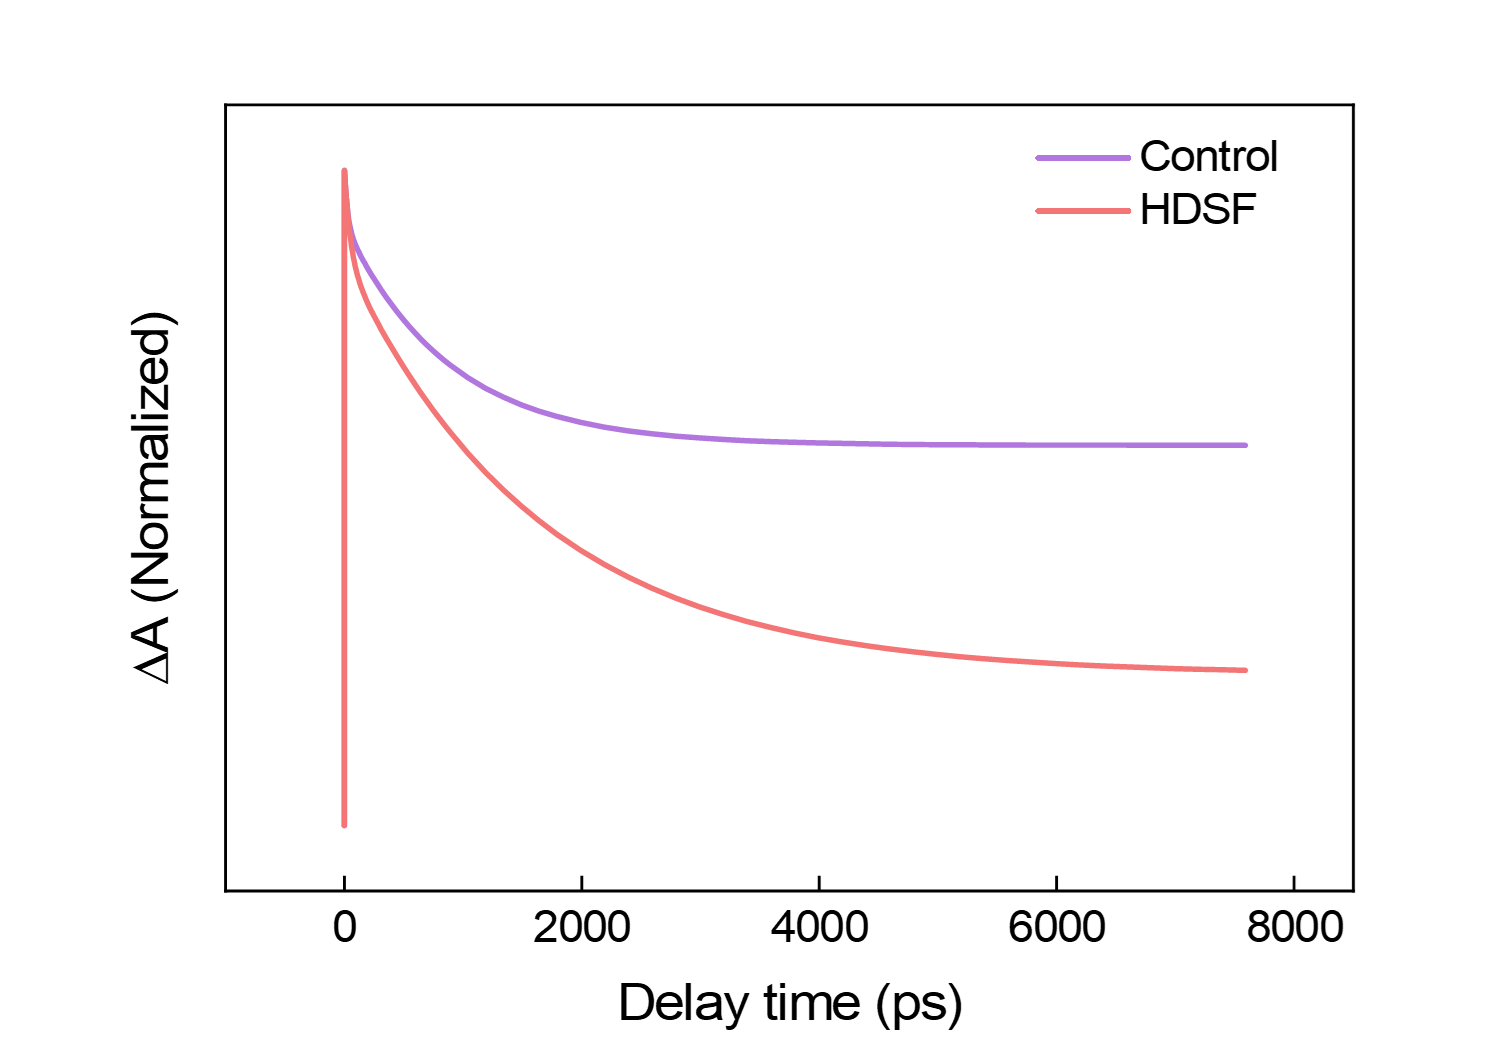


**Supplementary Fig. 14.** The normalized TA kinetic traces for photobleaching probed at 760 nm for the semi-devices based on corresponding perovskite films.


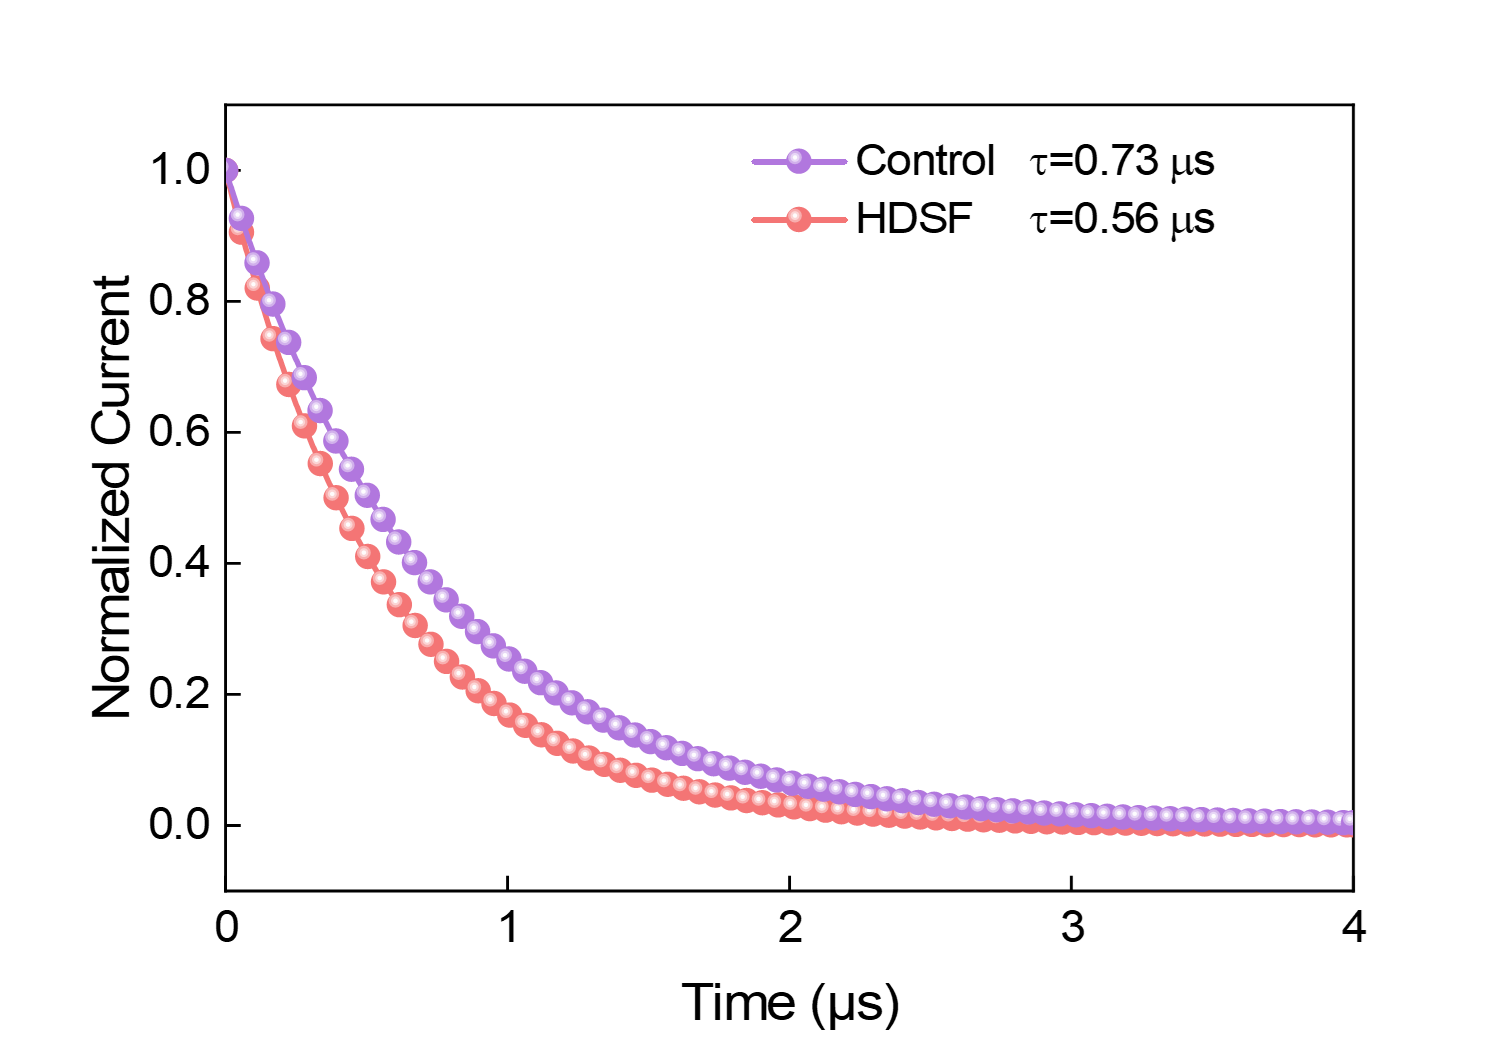


**Supplementary Fig. 15.** TPC measurements of devices with or without HDSF.


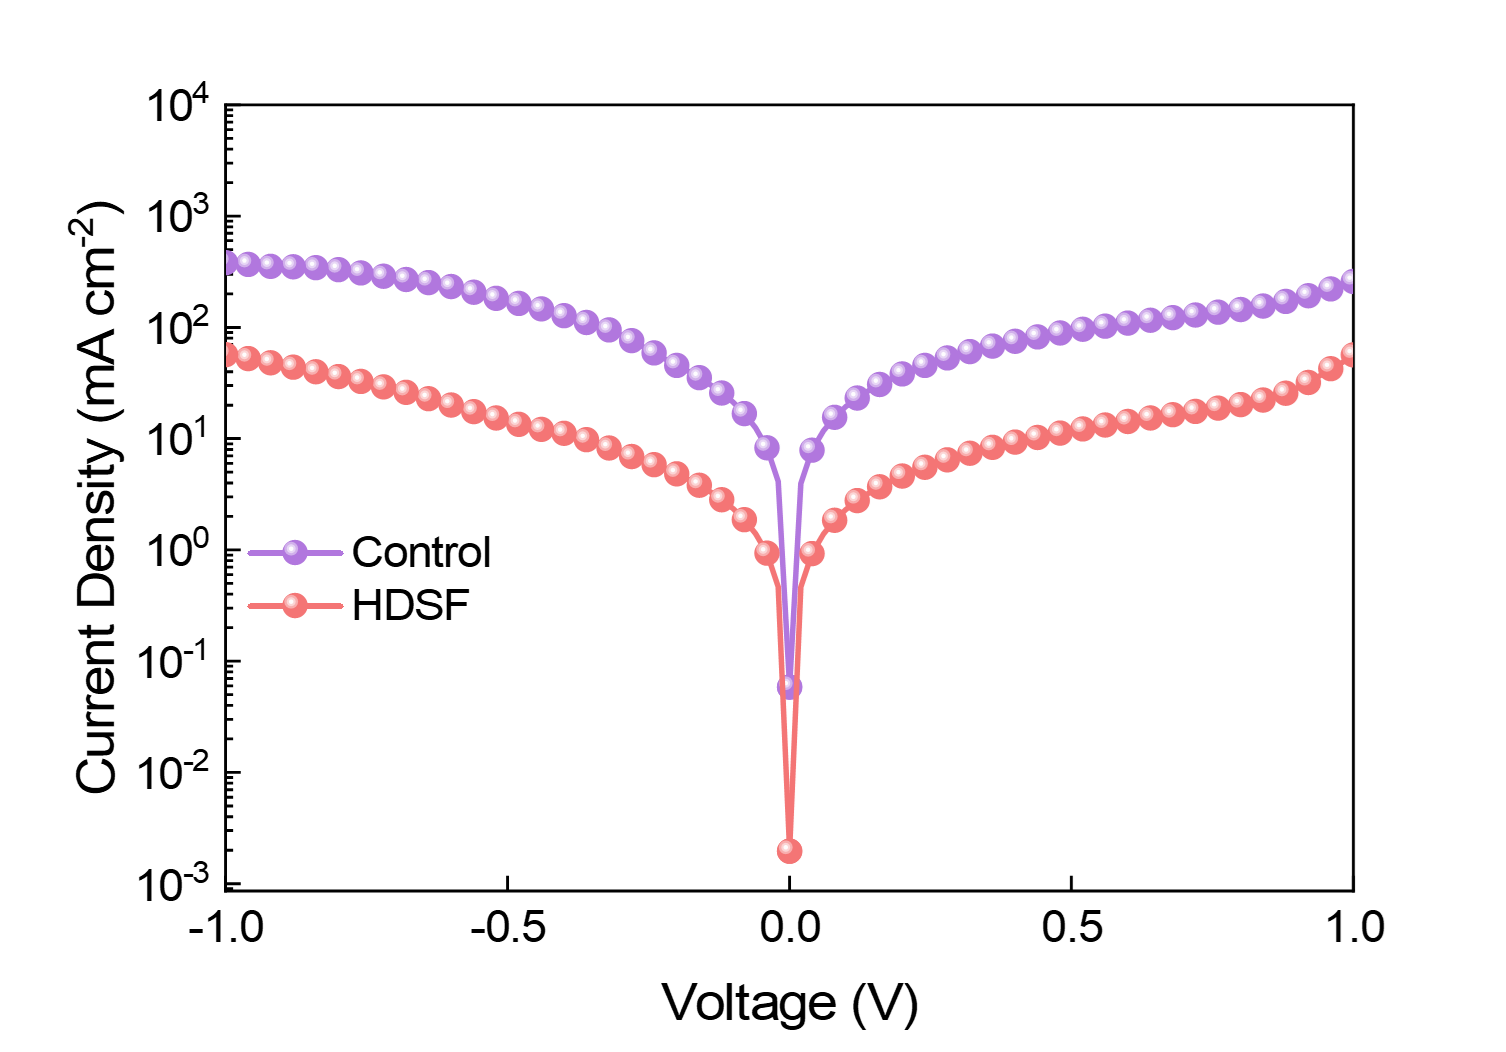


**Supplementary Fig. 16.** Dark *J-V* curves of the corresponding devices.


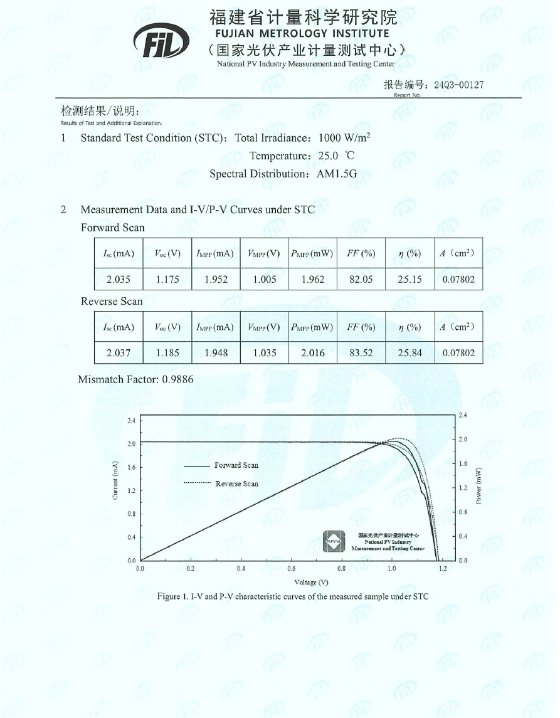


**Supplementary Fig. 17.** Certified performance of the HDSF-treated PSC. The certified efficiency is 25.84% under reverse scan (short-circuit current (*I*SC) of 2.037 mA, *V*OC of 1.185 V, and FF of 83.52%).


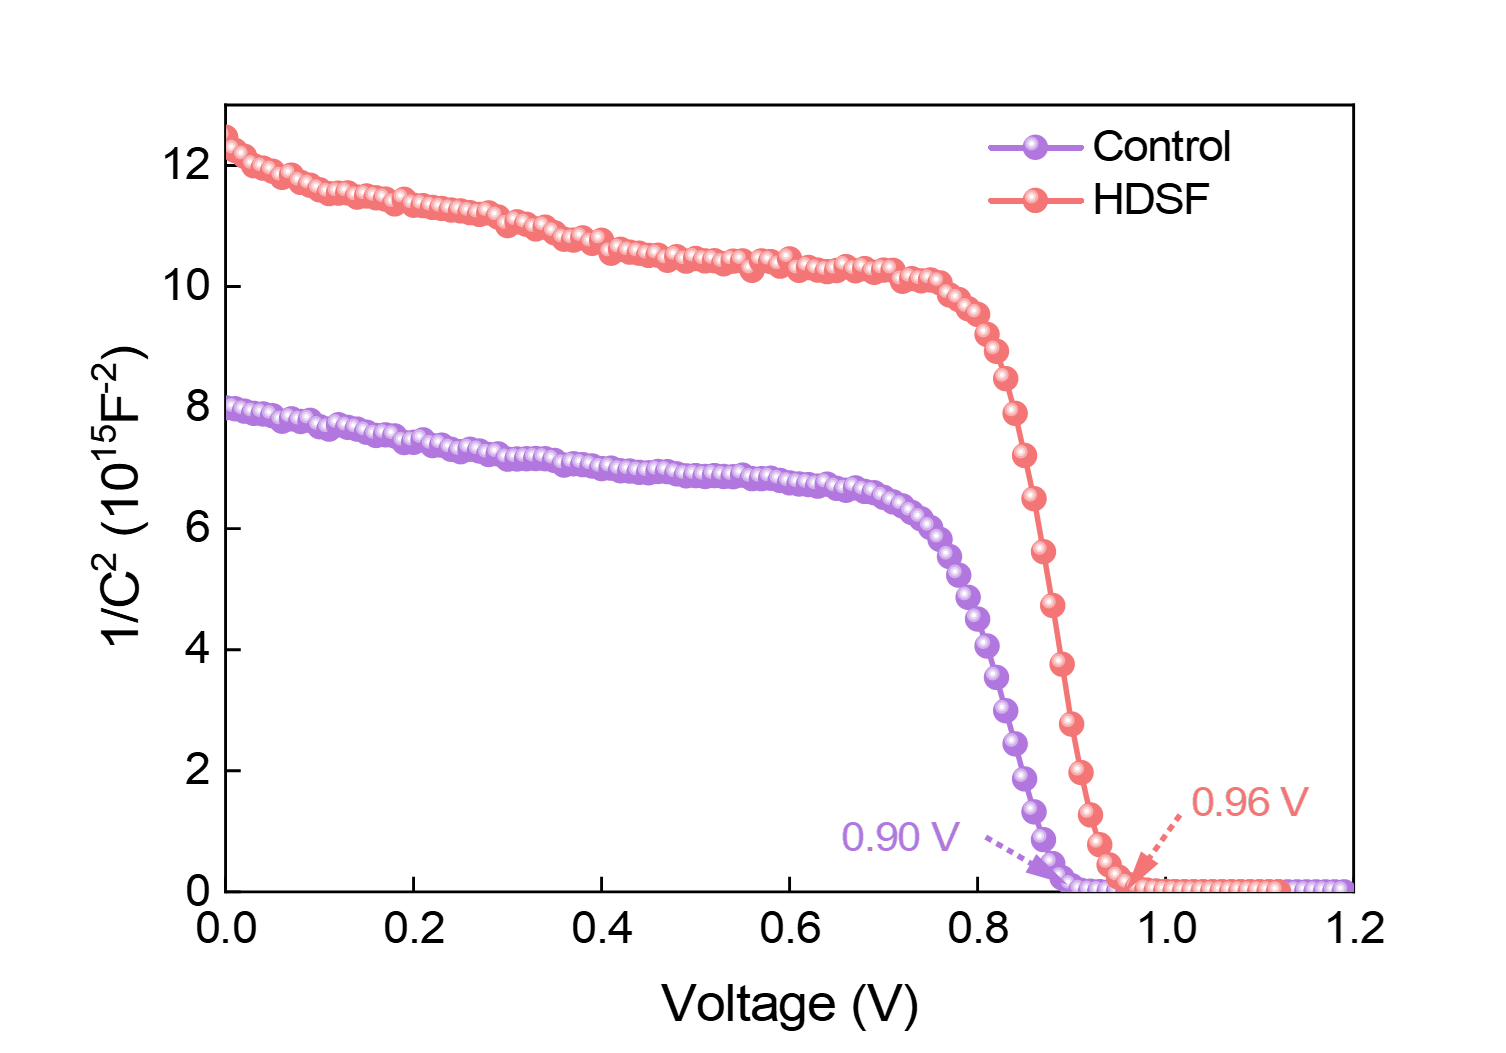


**Supplementary Fig. 18.** Mott–Schottky plots of devices with or without HDSF.


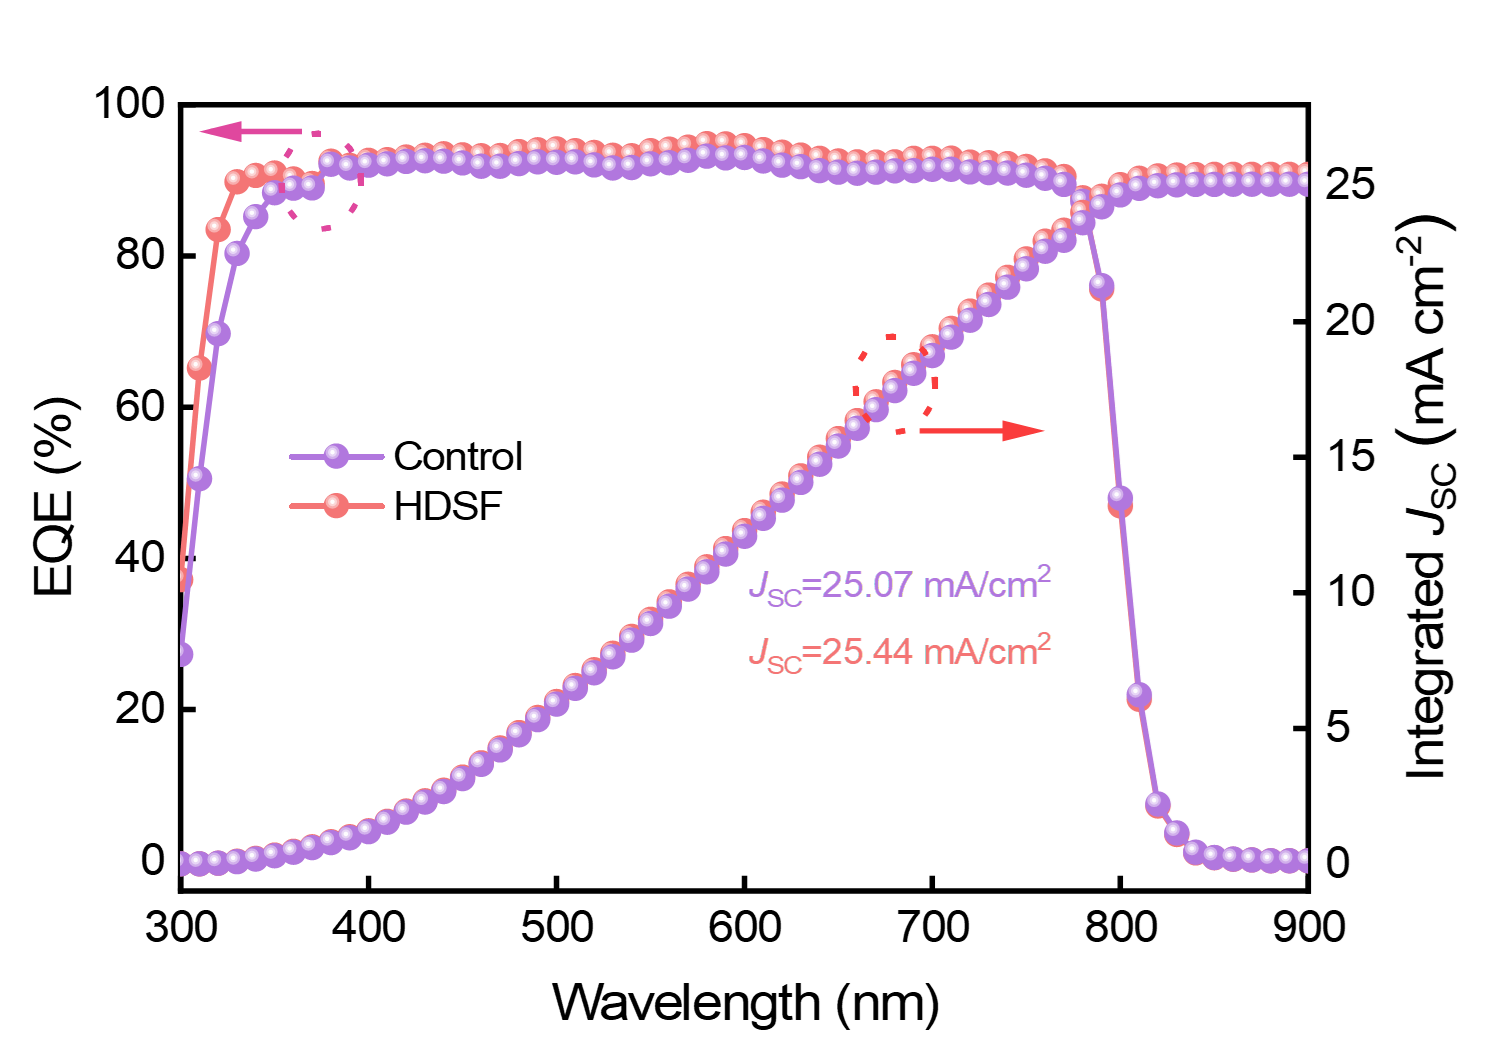


**Supplementary Fig. 19.** EQE spectra and integrated *J*SC for devices.


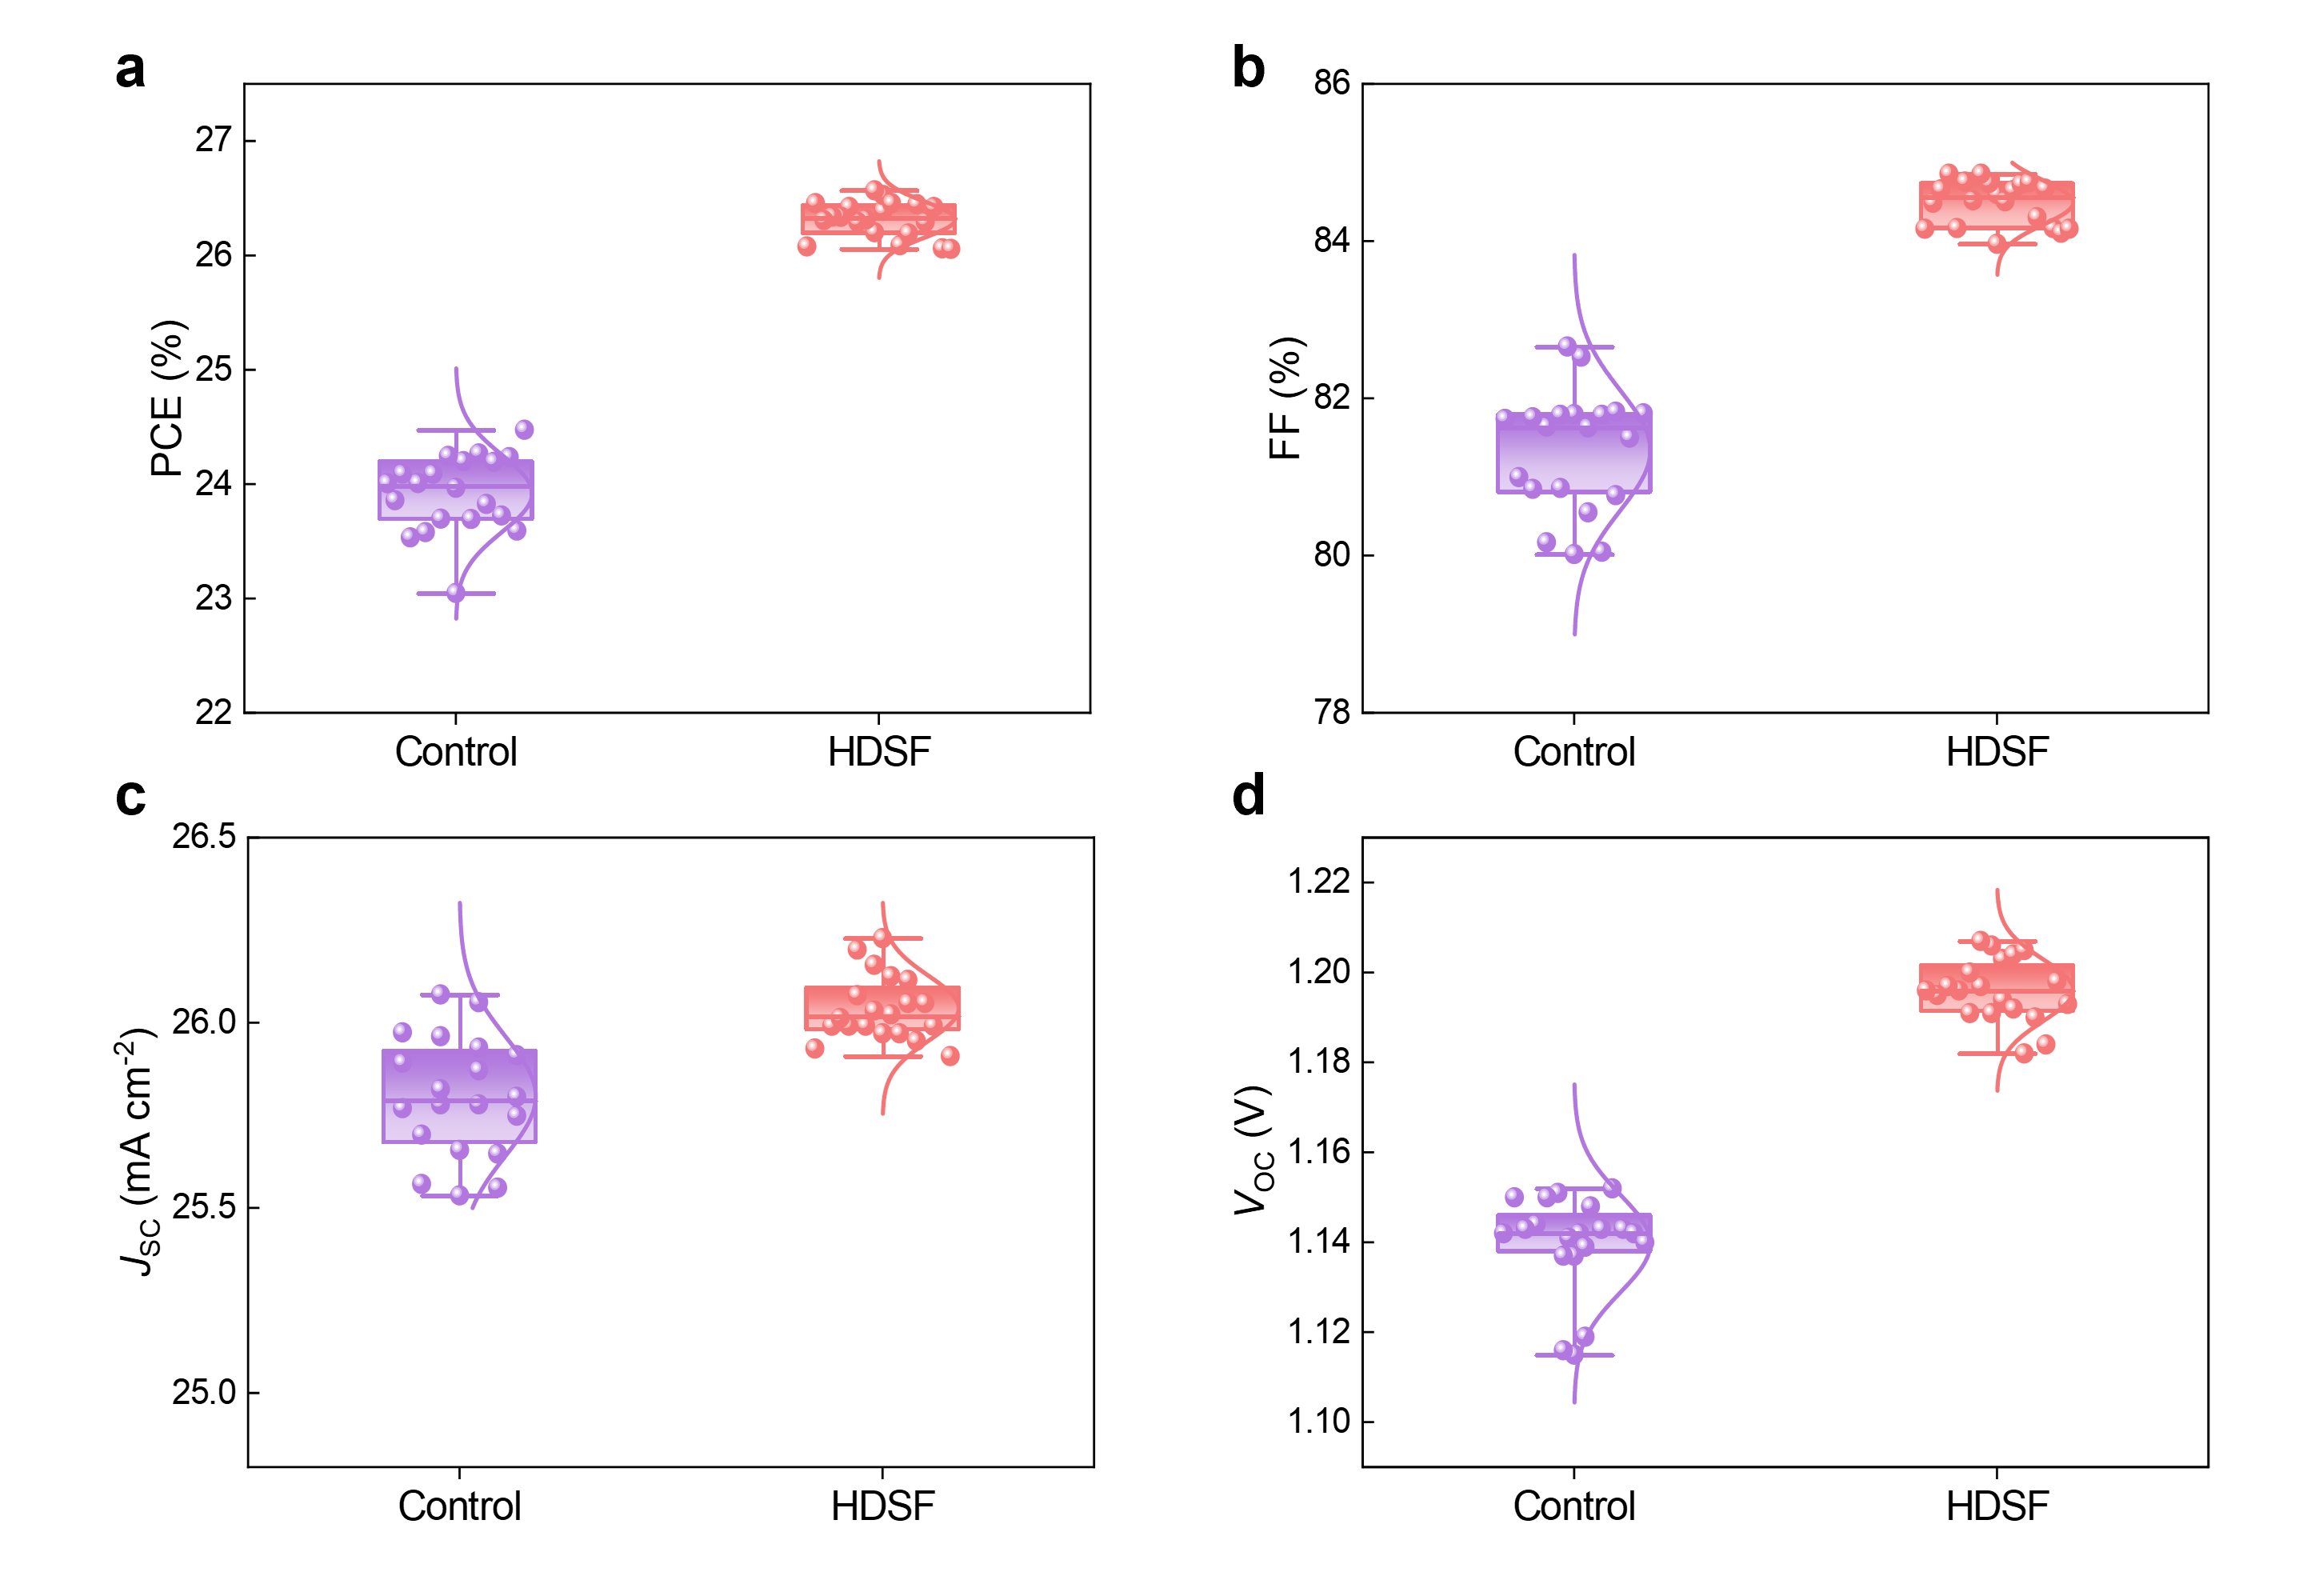


**Supplementary Fig. 20.** Statistic box charts of a) PCE, b) FF, c) *J*SC, and d) *V*OC distribution of 20 devices per type.


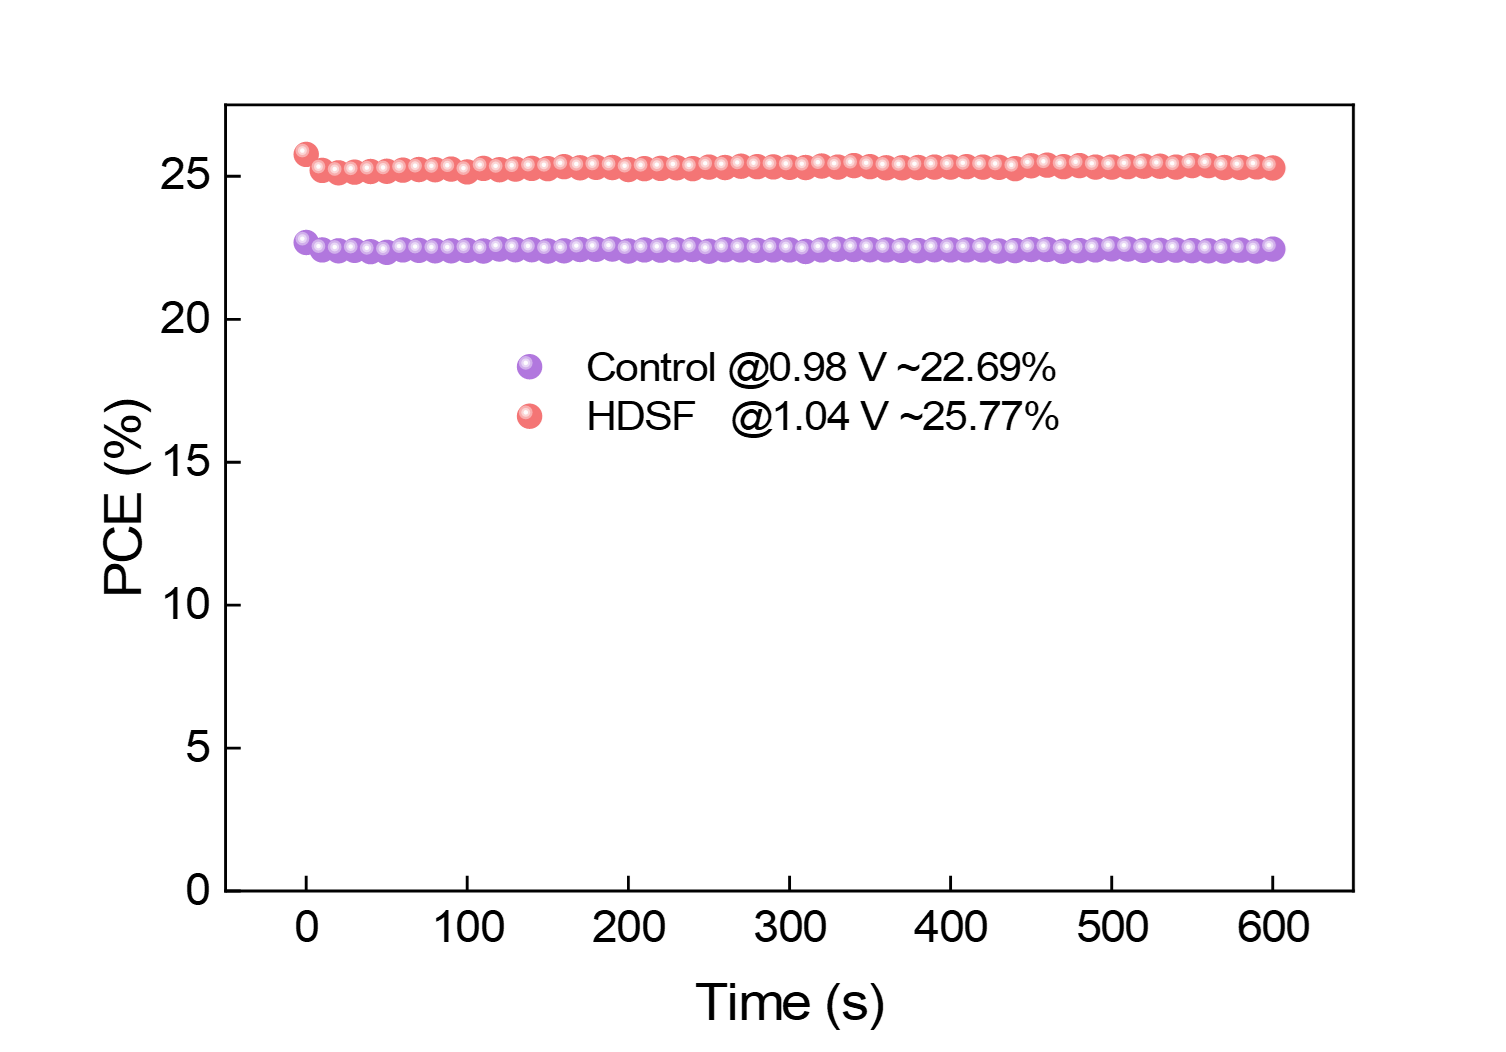


**Supplementary Fig. 21.** Stabilized power output (SPO) at maximum-power point tracking under working conditions with 100 mW cm−2 irradiation.


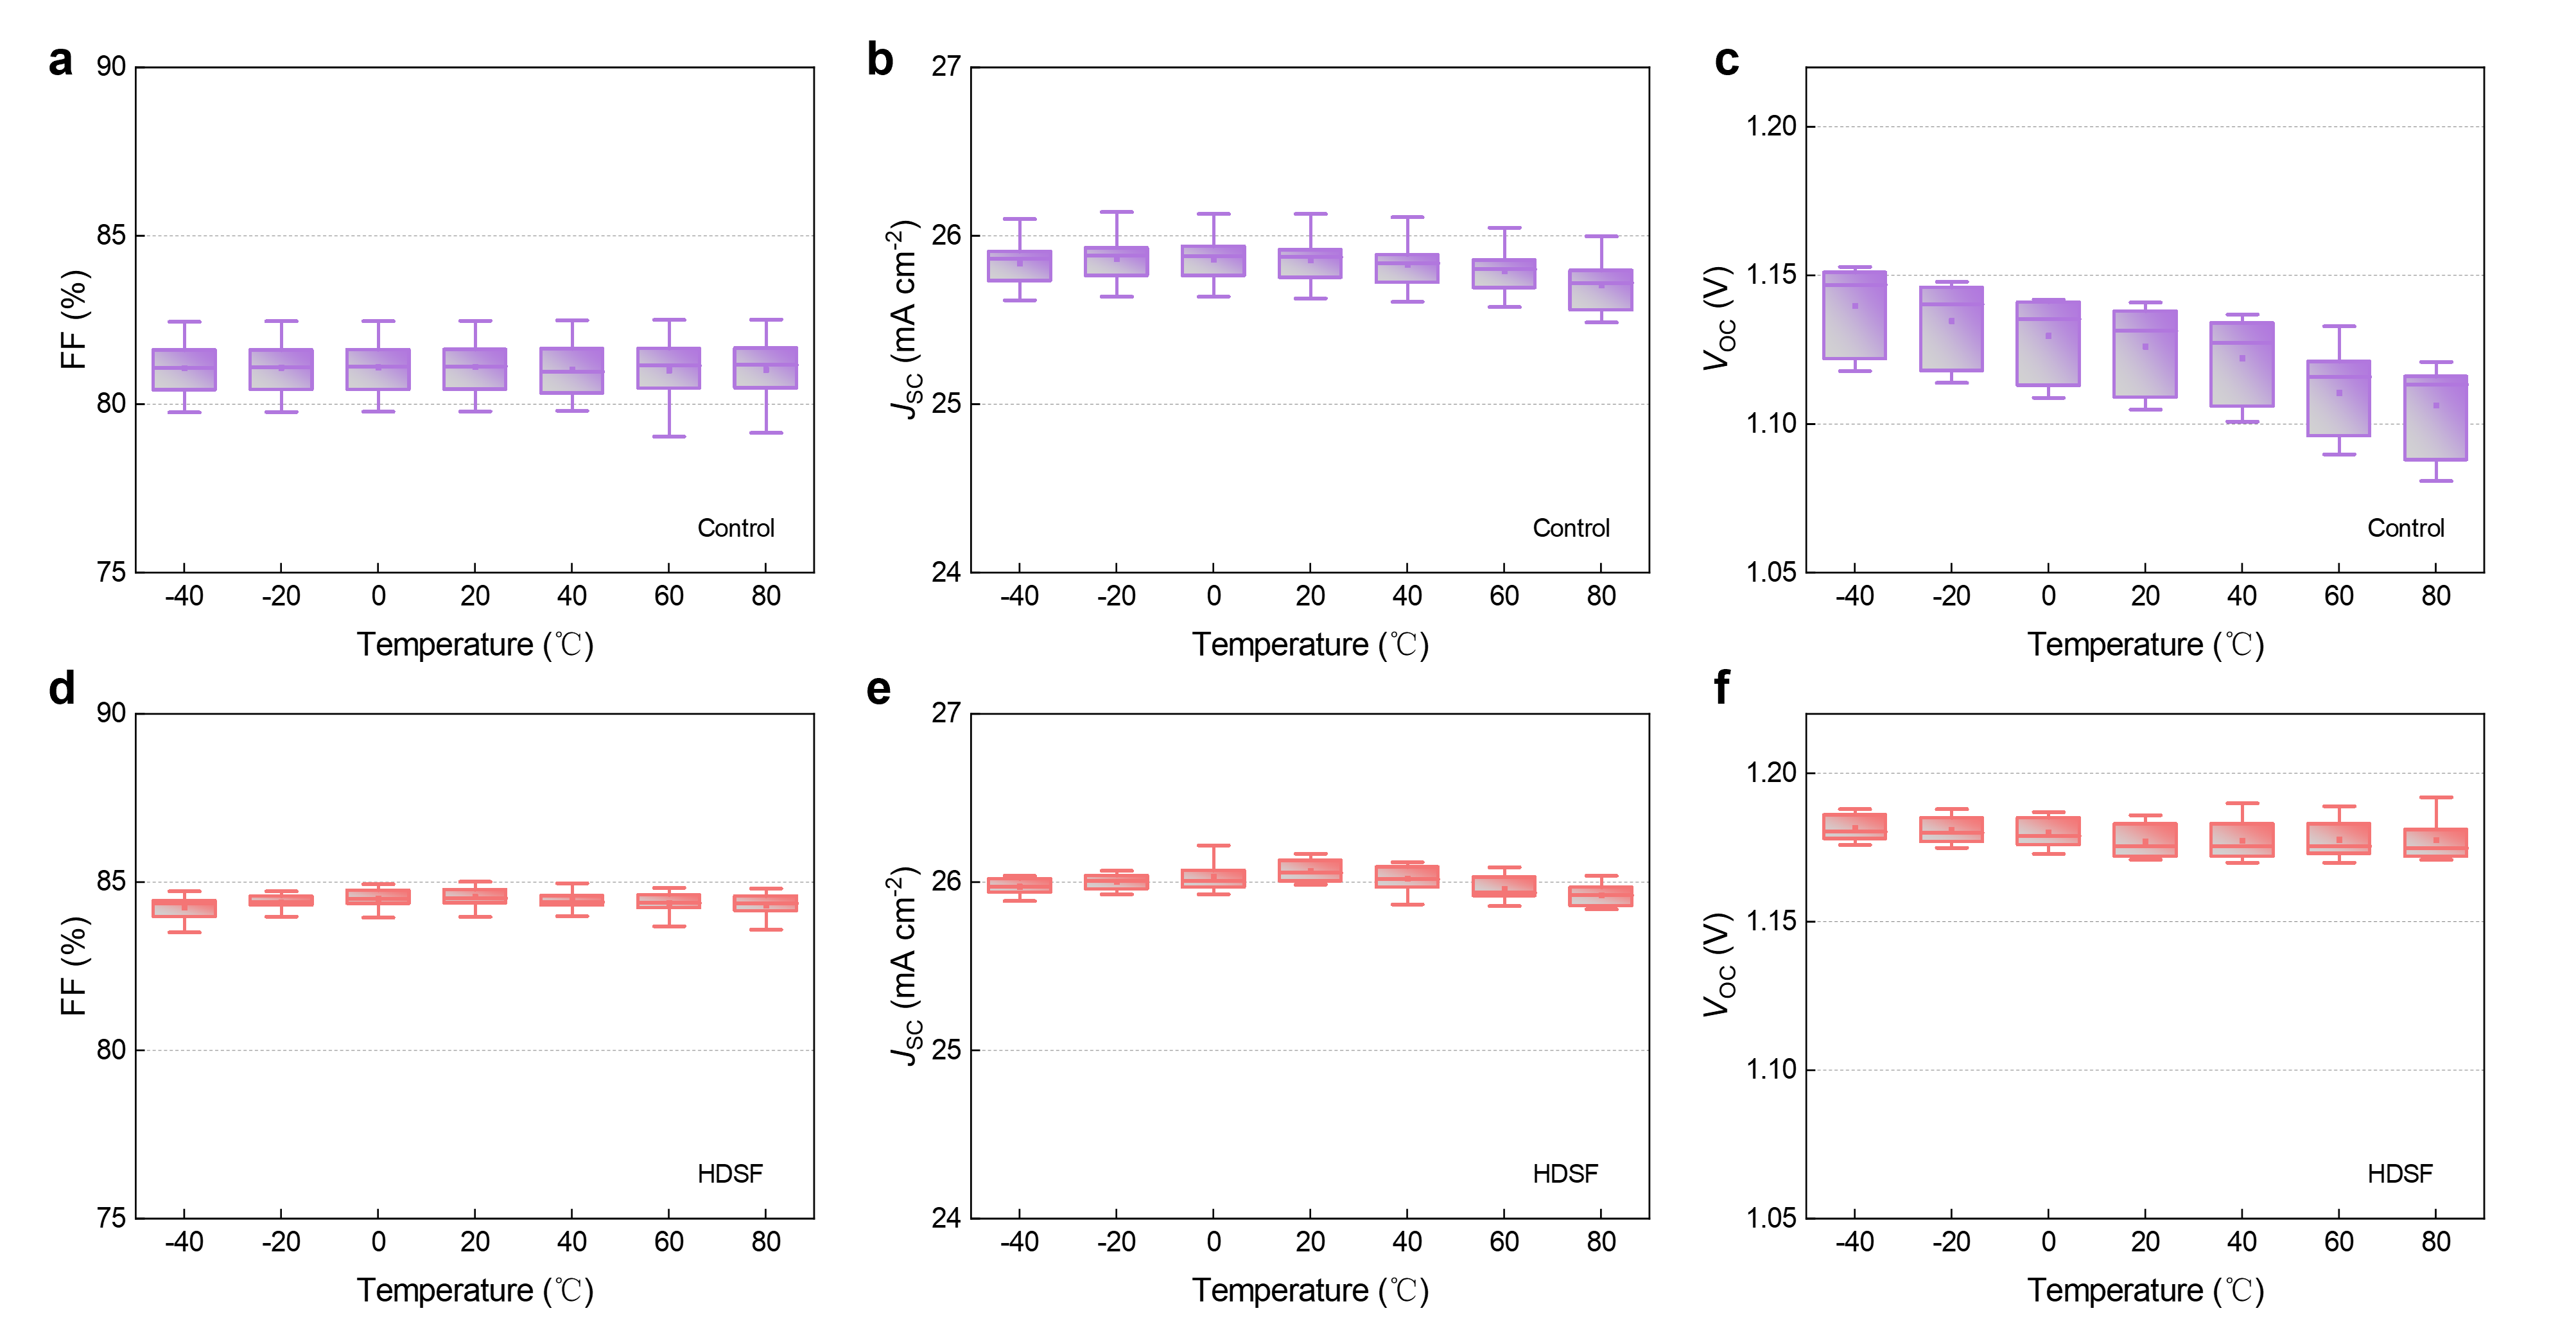


**Supplementary Fig. 22.** Statistical temperature-dependence profiles of a) FF, b) *J*SC, c) *V*OC for control devices, and d) FF, e) *J*SC, and f) *V*OC for HDSF-treated devices.


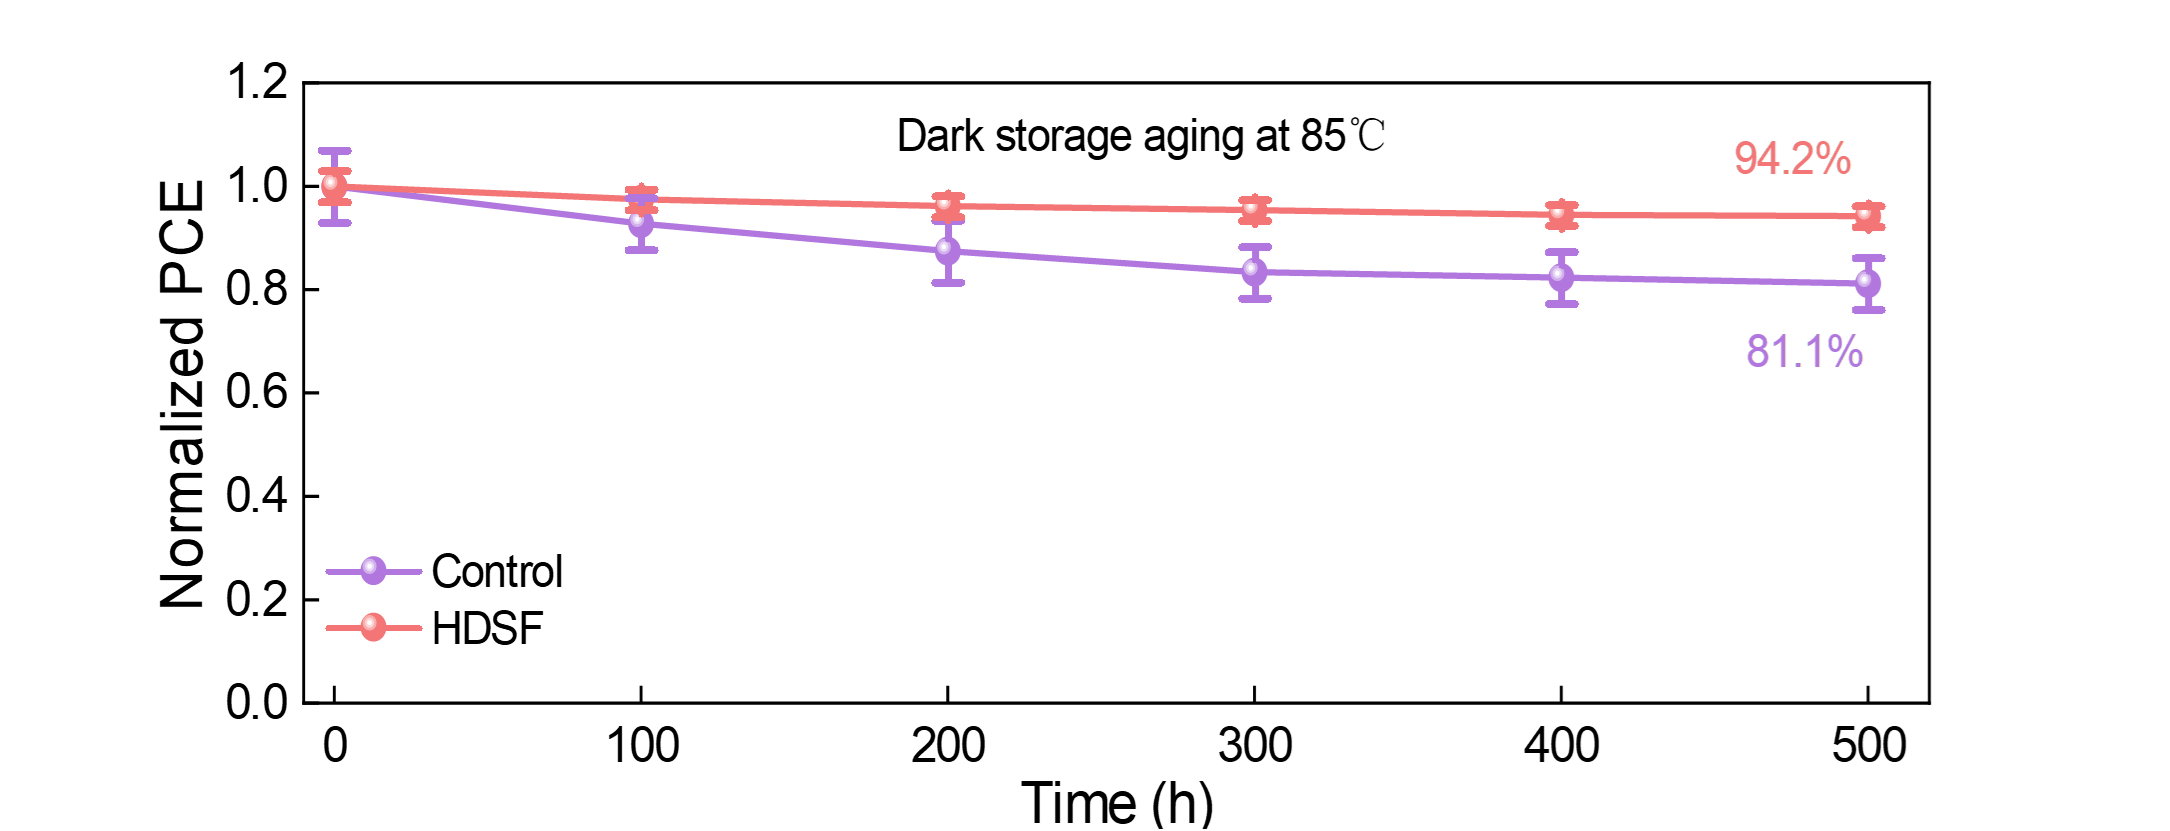


**Supplementary Fig. 23.** Thermal stability test of the unencapsulated devices at 85℃ in a nitrogen atmosphere.

**Supplementary Table 1.** The fitted parameters from TRPL curves of perovskite films. The average PL lifetime .

| Sample | A1 | (ns） | A2 | (ns) | Tave |
| --- | --- | --- | --- | --- | --- |
| Control | 5.81 | 8.00 | 0.76 | 104.50 | 68.98 |
| HDSF | 20.51 | 4.03 | 1.69 | 185.61 | 147.74 |
